1 **Full Title: Antiphospholipid antibodies exacerbate damage following oxygen**  
2 **deprivation-reperfusion injury in an *in vivo* model for stroke and in *ex vivo* blood**  
3 **derived endothelial cells**

4  
5 **Short Title:**  
6 **Antiphospholipid antibodies in reperfusion injury**

7  
8 Charis Pericleous<sup>1,2\*</sup>, Daniel J. Stuckey<sup>3‡</sup>, Robert T. Maughan<sup>1‡</sup>, Koralia Paschalaki<sup>1</sup>, Lida  
9 Kabir<sup>1</sup>, Lauren T. Bourke<sup>2</sup>, Rohan Willis<sup>4</sup>, Anisur Rahman<sup>2</sup>, Anna M. Randi<sup>1</sup>, Deepa J.  
10 Arachchillage<sup>5,6</sup>, Mark Lythgoe<sup>3</sup>, Ian P. Giles<sup>2</sup>, Justin C. Mason<sup>1,6§</sup>, Yiannis Ioannou<sup>2§</sup>

11  
12 <sup>1</sup>National Heart & Lung Institute, Imperial College London, London, UK

13 <sup>2</sup>Centre for Rheumatology, University College London, London UK

14 <sup>3</sup>Centre for Advanced Biomedical Imaging, University College London, London UK

15 <sup>4</sup>Rheumatology, University of Texas Medical Branch, Galveston, TX, USA

16 <sup>5</sup>Department of Immunology & Inflammation, Imperial College London, London UK

17 <sup>6</sup>Imperial College NHS Trust, London, UK

18  
19 ‡contributed equally

20 §joint senior authors

21  
22 **\*Corresponding author:**

23 Charis Pericleous

24 Imperial College London

25 National Heart & Lung Institute ICTEM L5

26 Du Cane Road, London W12 0NN

27  
28 Email: [c.pericleous@imperial.ac.uk](mailto:c.pericleous@imperial.ac.uk)

29 Tel: + 44 207 594 2728

52 **Abstract**

53

54 **Background:** Prothrombotic antiphospholipid antibodies (aPL) found in patients with  
55 antiphospholipid syndrome (APS) are a recognised risk factor for ischemic stroke. However,  
56 it is unclear if aPL cause injury post thrombolysis leading to worse outcomes. We investigated  
57 whether aPL exacerbate reperfusion injury and sought to translate our findings in endothelial  
58 colony forming cells (ECFC) isolated from patients with APS.

59 **Methods:** Transient ischemic stroke was induced in adult rats injected with serum-derived  
60 IgG from patients with APS (APS-IgG, containing aPL) or healthy controls (HC-IgG). Infarct  
61 size and intracellular signalling processes involved in ischemia-reperfusion injury were  
62 determined post reperfusion. *In vitro*, human umbilical vein endothelial cells (HUVEC) treated  
63 with IgG, as well as APS and HC ECFC, were exposed to hypoxia (0.1% O<sub>2</sub>). Cell death and  
64 relevant signalling mechanisms were assessed following reperfusion and compared to  
65 matched normoxic cultures.

66 **Results:** *In vivo*, APS-IgG induced >2-fold larger infarcts and lower levels of active  
67 phosphorylated Akt, a key pro-survival kinase, compared to HC-IgG. *In vitro*, aPL-mediated  
68 cell death and suppression of Akt phosphorylation was confirmed in HUVEC exposed to IgG  
69 and hypoxia-reperfusion. Consistent with these findings, higher rates of cell death and  
70 reduced Akt phosphorylation following reperfusion were observed in *ex vivo* APS ECFC  
71 compared to HC ECFC. Treatment with the immunomodulating agent hydroxychloroquine  
72 ameliorated ECFC death and this effect was more pronounced in APS-derived cells.

73 **Conclusion:** Patient-derived IgG aPL exacerbate cell death following reperfusion in a novel  
74 *in vivo* stroke model for APS, as well as *in vitro* HUVEC cultures. These observations are  
75 mimicked in *ex vivo* APS ECFC. Our findings describe a novel pathogenic role for aPL in  
76 mediating tissue injury in addition to their known thrombogenic properties and indicate  
77 potential for pharmacological intervention.

## 78 **Introduction**

79  
80 Stroke remains a significant cause of morbidity and mortality worldwide. Ischemic stroke  
81 accounts for >80% of cases and 10-15% of those occur in young adults.<sup>1</sup> Approximately 10-  
82 20% of patients under 50 years old with stroke have antiphospholipid syndrome (APS), the  
83 most common identifiable cause of acquired hypercoagulability in the general population.<sup>2,3</sup>  
84 APS is clinically defined by thrombotic events and/or obstetric complications with persistent  
85 presence of circulating antiphospholipid autoantibodies (aPL).<sup>4</sup> aPL positivity is a strong risk  
86 factor for stroke, particularly in young patients and in the absence of classical cardiovascular  
87 risk factors (e.g. hyperlipidemia, hypertension, smoking, metabolic disease). Risk of recurrent  
88 thrombosis is also elevated in aPL-positive young patients. A prospective study of >1800  
89 patients between 18-45 years old and previous ischemic stroke identified aPL as an  
90 independent predictor of long-term recurrent vascular events after first stroke using a  
91 composite endpoint of stroke, transient ischemic attack, myocardial infarction (MI) or other  
92 arterial events.<sup>5</sup>

93  
94 Pathogenic aPL are primarily raised against plasma cofactors that bind phospholipids; more  
95 recently pathogenic aPL that directly target phospholipids have also been described.<sup>6</sup> To date  
96 the plasma protein beta-2 glycoprotein I ( $\beta_2$ GPI) has been identified as the most important  
97 autoantigen. The ability of  $\beta_2$ GPI to bind cell membrane receptors and phospholipids  
98 facilitates aPL priming of endothelium, platelets, monocytes and neutrophils resulting in a  
99 proinflammatory and procoagulant phenotype.<sup>7</sup> Thrombosis in APS is a 'two-hit' phenomenon:  
100 aPL provide the first thrombophilic 'hit' and clotting ensues upon exposure to a second 'hit'  
101 such as infection or injury. Endothelial injury is central to APS pathogenesis, and existing  
102 animal models convincingly demonstrate the prothrombotic nature of aPL and endothelial  
103 involvement in carotid, cardiac, mesenteric and femoral vascular territories.<sup>8-14</sup>

104  
105 Restoration of blood flow with thrombolysis is the first-line treatment for occlusive ischemic  
106 events. However, organ reperfusion can exacerbate tissue damage. The extent of reperfusion  
107 injury is ultimately determined by the complex interplay between intracellular 'live-or-die'  
108 signals modulated by the activity of key protein kinases. In cardiac ischemia-reperfusion injury,  
109 the role of protein kinase B (PKB/Akt) and p38-mitogen activated protein kinase  
110 (MAPK)/extracellular signal-regulated kinase (ERK) signalling are well established and  
111 directly relate to myocardial damage.<sup>15</sup> Similarly, these kinases are implicated in brain  
112 ischemia-reperfusion injury and neuronal survival.<sup>16,17</sup> aPL can regulate all three kinases.<sup>7,18-</sup>  
113 <sup>24</sup> We previously demonstrated that aPL engage p38-mitogen activated protein kinase (MAPK)  
114 to promote cell death in a model of hypoxia-reperfusion injury *in vitro* using primary rat  
115 cardiomyocytes; this mechanism was dependent on the interaction between aPL and the  
116 immunodominant region of  $\beta_2$ GPI.<sup>25</sup> *In vivo*,  $\beta_2$ GPI localizes to the liver and uterus but spreads  
117 to the brain when mice are challenged with lipopolysaccharide<sup>26</sup> suggesting that  $\beta_2$ GPI  
118 localizes to the brain following a pathogenic insult. Following stroke,  $\beta_2$ GPI synthesis is  
119 upregulated in the liver, localizes to the brain parenchyma and endothelium, and promotes  
120 vascular inflammation.<sup>27</sup> It is therefore plausible that, following ischemia-reperfusion injury and  
121 endothelial blood-brain barrier (BBB) breakdown, aPL entering the brain microcirculation can  
122 interact with brain tissue via  $\beta_2$ GPI.

123  
124 It is unclear whether aPL increase stroke severity or impact long-term outcomes; studies in  
125 patients are limited but suggest increased stroke severity and risk of post-stroke disability,<sup>28</sup>  
126 cognitive impairment<sup>29</sup> and haemorrhagic transformation associated with longer  
127 hospitalisation periods and higher mortality.<sup>30</sup> We hypothesized that aPL disrupt the fine  
128 balance between cell survival and death post ischemia and exacerbate stroke damage during  
129 reperfusion by targeting essential survival signalling mechanisms. We employed a well-  
130 established rat model of transient middle cerebral artery occlusion (MCAO) to design the first

131 *in vivo* model for stroke in APS and translated our findings in patient endothelial colony forming  
132 cells (ECFC), a novel source of patient-derived endothelium isolated from venous blood.<sup>31</sup>  
133

## 134 **Methods**

### 136 **Patients and healthy donors**

137 All research subjects signed informed consent according to the Declaration of Helsinki and  
138 approved by the appropriate local, regional and/or national Ethics board (University College  
139 London, Imperial College London, University of Texas Medical Branch).  
140

141 A total of 20 patients with APS and 17 healthy controls (HC) were recruited for this study.  
142 Polyclonal IgG was isolated from 14 APS and 12 HC; ECFC were isolated from 12 APS and  
143 12 HC donors. Samples from 6 patients and 7 HC were used for both IgG and ECFC isolation.  
144 Demographics and clinical information are listed in Table 1. Positive aPL status was recorded  
145 from clinical records and confirmed for IgG anti-cardiolipin (aCL) and anti- $\beta$ 2GPI (a $\beta$ 2GPI)  
146 using in-house assays (see Methods: IgG aPL activity).  
147

### 148 **IgG purification**

149 IgG was purified from human serum by protein G chromatography (ThermoFisher Scientific  
150 UK). IgG preparations were concentrated and dialyzed in phosphate buffered saline (PBS)  
151 and confirmed to be free of endotoxin (<0.1EU/mL at 1mg/mL concentration of IgG) (EndoLisa,  
152 Hyglos Germany).  
153

154 For *in vivo* experiments, equal amounts of IgG isolated from two APS patients with comparable  
155 aPL activity (Table 1) were pooled into a single sample (APS-IgG). A second IgG pool was  
156 prepared from four aPL-negative healthy controls (HC-IgG). Both pools were prepared to a  
157 concentration of 1mg/mL under sterile conditions. For *in vitro* experiments, IgG samples were  
158 tested individually at a concentration of 100 $\mu$ g/mL.  
159

### 160 **IgG quantification**

161 Individual and pooled IgG samples were quantified by spectrophotometry and enzyme-linked  
162 immunosorbent assay (ELISA).<sup>13,32</sup> Briefly, 96-well maxisorp plates (Nunc) were coated with  
163 an Fc-specific anti-human IgG antibody (Sigma-Merck UK) and blocked to minimize non-  
164 specific binding. Serially diluted human IgG was tested in duplicate. Goat anti-human  
165 horseradish peroxidase (HRP)-conjugated IgG (Sigma-Merck), tetramethylbenzidine (TMB)  
166 substrate and 0.1M sulphuric acid (KPL Diagnostics, Insight Biotechnology UK) were  
167 employed and optical density read at 450nm. IgG concentrations were calculated from a  
168 standard curve generated by serially diluting commercially sourced IgG from 100ng/mL to  
169 3.125ng/mL (Sigma-Merck).  
170

171 Human IgG content was also measured in rodent serum (1:400 dilution)<sup>13,32</sup> and neat brain  
172 tissue lysates (prepared as described below). To confirm assay specificity for human IgG,  
173 serum and brain lysates from three rats not injected with human IgG or subjected to MCAO  
174 were tested. No signal was detected (data not shown).  
175

### 176 **IgG aPL activity**

177 IgG aCL and a $\beta$ 2GPI activity was measured in purified IgG fractions, human and rat serum  
178 using direct ELISA with pre-defined cut offs as previously described.<sup>33</sup> In brief, 96-well plates  
179 were coated with bovine cardiolipin (Sigma-Merck) or human  $\beta$ 2GPI (Enzyme Research  
180 Laboratories UK). Human serum, rodent serum and purified IgG (serially diluted from  
181 500 $\mu$ g/mL) were tested as described.<sup>13,32</sup> Signal detection was performed as per the total  
182 human IgG ELISA. aCL activity was defined as IgG phospholipid units (GPLU) using validated  
183 calibrators (Louisville aPL Diagnostics, USA; activity range 16-120 GPLU). For a $\beta$ 2GPI,  
184 activity was defined as IgG  $\beta$ 2GPI units (GBU) using in-house calibrators (activity range 3.1-

185 100 GBU). Titres >99<sup>th</sup> percentile of the activity of n=200 control sera were considered positive  
186 (17GPLU; 8GBU).<sup>33</sup> LA testing and interpretation was performed by the clinical laboratory  
187 following ISTH guidelines.<sup>34</sup>

188

### 189 ***In vivo* studies**

190 Animal studies were approved by the University College London Biological Services Ethical  
191 Review Committee and licensed under the UK Home Office regulations and the Guidance for  
192 the Operation of Animals (Scientific Procedures) Act 1986 (Home Office, London, United  
193 Kingdom). Male Sprague Dawley (SD) rats (Charles River, UK) weighing between 200-220g,  
194 receiving a standard diet and water ad libitum were anaesthetized with 2% isoflurane and  
195 injected intravenously with 1mg of pooled APS-IgG or HC-IgG (n=5 per group). The trachea  
196 and common carotid artery (CCA) were exposed and isolated. Fifteen minutes post IgG  
197 injection, a sterile microfilament was introduced into the CCA and positioned to fully occlude  
198 the right MCA.<sup>35,36</sup> After 0.5hr or 1hr ischemia, the microfilament was removed to enable  
199 reperfusion. Animals were allowed to recover, provided with soft tissue bedding, unrestricted  
200 access to water and food and euthanized 24hr post reperfusion (endpoint).

201

202 Two additional groups of rats (n=6 per group) were injected with 1mg of APS-IgG or HC-IgG  
203 but not subjected to MCAO surgical procedures. Animals were maintained for 24hr post  
204 injection prior to sacrifice.

205

206 Immediately following sacrifice, blood was collected by cardiac puncture for serum isolation.  
207 Selected organs were examined and collected for downstream analysis as described below.  
208 A schematic of our model is shown in Supplementary Figure 1B.

209

### 210 **Infarct size analysis**

211 Brains isolated from rats subjected to MCAO were cut into 1mm slices and stained with  
212 tetrazolium chloride (TTC) to discriminate between metabolically active (red) and dead tissue  
213 (white). Representative slices from an APS-IgG treated rat are shown in Figure 1C. A total of  
214 12-13 slices per animal were digitally analysed by a technician blinded to the treatment groups.  
215 The area (mm<sup>3</sup>) of viable and infarcted regions (Figure 1C, red and white tissue respectively)  
216 was measured on both sides of each slice and lesion size calculated as a percentage of total  
217 brain area.

218

### 219 **Endothelial cell culture**

220 Pooled human umbilical vein endothelial cells (HUVEC, Lonza) were cultured in complete  
221 endothelial growth medium (EGM2) containing 10% FBS. Experiments were performed at  
222 passage 4.

223

224 For ECFC generation, peripheral blood mononuclear cells (PBMC) were isolated from whole  
225 blood by gradient centrifugation (Ficoll-Paque Plus GE Healthcare). Counted viable PBMC  
226 were resuspended in complete EGM2 supplemented with 20% FBS and seeded at  $\geq 0.8 \times 10^6$   
227 / cm<sup>2</sup> in culture vessels pre-coated with Type I rat tail collagen (BD Bioscience). The media  
228 was carefully changed two days post-seeding and repeated every 2-3 days. From five days  
229 post-seeding, cultures were routinely screened for the appearance of cobblestone cells that  
230 formed dense endothelial colonies over time. Cultures were expanded for 6-8 weeks post-  
231 PBMC seeding. Our ECFC isolation protocol is summarized in Supplementary Figure 3A.  
232 Representative images of an emerging colony, expanded ECFC and expression of canonical  
233 endothelial markers detected by immunofluorescence, are shown in Supplementary Figure  
234 3B. ECFC were confirmed to be of endothelial but not myeloid lineage by flow cytometry  
235 (CD31+/CD144+/CD146+/CD45-/CD14-, Supplementary Figure 3C) and  $\geq 98\%$  pure at  
236 passage 4. Experiments were performed at passage 4-5.

237

### 238 **Simulated hypoxia-reperfusion *in vitro***

239 Hypoxia was mimicked by incubating cell cultures in 0.1% O<sub>2</sub>/5% CO<sub>2</sub> supplemented with  
240 nitrogen (H35 hypoxic workstation, Don Whitley Scientific) for 4hrs followed by reperfusion  
241 under standard culture conditions (~20% O<sub>2</sub>) for 0.5hr to 24hrs. Endothelial basal medium  
242 (EBM2) in the absence of growth factors or FBS was used during hypoxia. Cells were switched  
243 back to complete EGM2 during reperfusion. Where indicated, matched normoxic cultures were  
244 kept under standard conditions in EGM2 for the duration of each experiment. Endothelial  
245 cultures were routinely visualized to confirm confluency and monolayer robustness throughout  
246 the outlined experimental conditions and time points. All measurements were performed in ≥  
247 2 independent experiments.

248  
249 HUVEC were pre-incubated with 100µg/mL purified human IgG for 24hr prior to hypoxia-  
250 reperfusion simulation. IgG was retained in the culture medium at all times.

251  
252 ECFC were cultured in the absence of exogenous IgG. For targeted experiments with  
253 hydroxychloroquine (HCQ, 10µg/mL), ECFC were pre-treated with the drug for 24hr prior to  
254 hypoxia-reperfusion simulation. HCQ was retained in the culture medium at all times.

### 255 256 **Protein extraction**

257 Small brain slices from the posterior part of the brain were collected from all animals (MCAO  
258 and no MCAO) and snap frozen in liquid nitrogen. The kidney, liver, spleen, left carotid artery  
259 and aorta were also snap frozen. Tissues were ground to a fine powder using a mortar and  
260 pestle placed on dry ice. Approximately 150-200µg of ground tissue was mixed with RIPA  
261 (ThermoFisher) or cell lysis buffer (Cell Signaling Technologies UK) containing protease and  
262 phosphatase inhibitors (Roche) and incubated on ice for 10min. Lysates were passed through  
263 a glass homogeniser and incubated on ice for a further 15min, then spun at 17000g for 10min  
264 to pellet cell debris. Total protein in collected supernatants was quantified by bicinchoninic  
265 acid (BCA) assay (ThermoFisher) and stored at -20°C.

266  
267 HUVEC and ECFC were placed on ice and washed twice with HBSS, incubated for 10min  
268 with lysis buffer and manually scraped off the culture vessel. Lysates were spun, supernatant  
269 collected and quantified as above.

### 270 271 **Immunoblotting**

272 10µg protein lysate was mixed with loading buffer containing SDS and dithiothreitol (DTT),  
273 boiled at 95°C for 5mins, separated by electrophoresis (4-12% Bolt Bis-Tris pre-cast gels,  
274 ThermoFisher) and transferred onto polyvinylidene difluoride (PDVF) membrane (GE  
275 Healthcare UK). Membranes were incubated with primary antibodies followed by species-  
276 specific HRP-conjugated or fluorescently labelled secondary antibodies (Supplementary  
277 Table 1). Proteins were visualized by chemiluminescence after substrate addition (ECL, GE  
278 Healthcare) or by fluorescence (LICOR Odyssey imaging system). Molecular target levels  
279 were normalised by calculating the ratio between phosphorylated and total target protein or  
280 phosphorylated protein and housekeeping/loading controls.

### 281 282 **Immunoprecipitation**

283 100µg tissue lysate in 200µL lysis buffer was mixed with 5µL of Akt antibody and incubated  
284 with gentle rocking overnight at 4°C. Then, 20µL of protein G agarose (ThermoFisher) was  
285 added for a further 3hr and the mixture centrifuged at 14000g for 30sec. After five washes with  
286 cold lysis buffer, the pellet was resuspended in SDS loading buffer and handled as described  
287 above.

### 288 289 **Endothelial cell kinetic apoptosis & necrosis assay**

290 HUVEC or ECFC were seeded at 1x10<sup>4</sup> per well in 96-well white walled clear bottom culture  
291 plates and tested in triplicate under hypoxia-reperfusion and normoxic conditions. Following  
292 2hr reperfusion, apoptosis and necrosis was simultaneously measured in hypoxia-reperfusion  
293 and matched normoxic plates by luminescence and fluorescence respectively (RealTime-Glo

294 Annexin V Apoptosis and Necrosis Assay, Promega UK). Luminescence and fluorescence  
295 measurements were obtained for 24hr post reperfusion and expressed as fold change of  
296 apoptosis or necrosis in hypoxia-reperfusion versus matched normoxic cells. Samples were  
297 tested in  $\geq 2$  independent experiments.

298  
299 As a positive control for this assay, HUVEC under normoxic conditions were treated for 2hr  
300 with 100 $\mu$ M hydrogen peroxide (H<sub>2</sub>O<sub>2</sub>) followed by washout/recovery for 24hr. H<sub>2</sub>O<sub>2</sub> induced  
301 both necrosis and apoptosis (Supplementary Figure 2A). Results are expressed as fold  
302 change of apoptosis/necrosis between H<sub>2</sub>O<sub>2</sub> and untreated HUVEC (n=2 individual HUVEC  
303 pools).

### 304 305 **Statistical analysis**

306 Results are presented as (A) Box-and-whisker plots with each data point representing an  
307 individual sample. The vertical line inside each plot represents the median value for each data  
308 set  $\pm$  interquartile range (IQR); or (B) line graphs, each line representing an individual sample.  
309 Two-tailed unpaired Mann Whitney were used to compare 2 experimental groups and  
310 Kruskal-Wallis followed by Dunn's multiple comparisons tests for >2 groups. Where  
311 applicable, paired analysis was performed with equivalent paired non-parametric tests. For  
312 correlation analysis, Spearman's tests were applied. Significance in all cases, p<0.05.  
313 Experiments with n $\leq$ 3 per group were not statistically analysed.

### 314 315 **Results**

#### 316 317 **APS-IgG increase brain infarct size**

318 For *in vivo* studies, purified IgG was pooled from 2 patients with APS and 4 HC (Table 1).  
319 Patients were triple aPL positive in serological assays (LA, high titre IgG aCL, IgG a $\beta$ <sub>2</sub>GPI)  
320 and all HC were negative. Purified IgG samples were individually tested for aPL activity prior  
321 to pooling, confirming high-titre aPL activity in APS-IgG (at 100 $\mu$ g/mL, aCL and a $\beta$ <sub>2</sub>GPI activity  
322 was >100 units for both samples)<sup>33</sup> and lack of aPL activity in HC-IgG (tested at up to  
323 500 $\mu$ g/mL; Supplementary Figure 1A).

324  
325 In the first instance, we performed MCAO for 1hr followed by 24hr reperfusion. Brain infarcts  
326 in the APS-IgG group tended to be larger than HC-IgG. The border zone, the most peripheral  
327 zone of the affected area and with less distinct pallor than the infarcted core, was also  
328 extended (Figure 1A). However, three of eight animals injected with APS-IgG (37.5%) died  
329 within 2hr reperfusion. Histology performed on two of three deceased rats revealed infarcts  
330 >30% of total brain area (Figure 1A, red diamonds). For the remaining five APS-IgG animals  
331 that survived 24hr post reperfusion plus the two histologically analysed animals that died, we  
332 observed a series of systemic abnormalities during histological analysis. Specifically, we  
333 identified brain clots in 4/7 animals; liver clots in 1/7; dark areas across the heart in 5/7; dark  
334 areas in the lungs in 1/7; trouble breathing in 1/7; piloerection in 1/7; and viscous blood in 3/7.  
335 Only one animal in the HC-IgG group had dark spots on the liver and viscous blood at  
336 endpoint.

337  
338 The sudden death of a substantial proportion of APS-IgG animals combined with our  
339 histological observations suggested that experimental conditions were too harsh in the  
340 presence of aPL, and potentially resembled a phenotype closer to the clinical syndrome  
341 'catastrophic APS.' This rare form of APS is typified by spontaneous development of multiple  
342 microthrombi, consequent multi-organ failure and 40-50% mortality despite aggressive  
343 immunosuppression. Therefore, we opted to reduce the duration of MCAO to 0.5hr and  
344 maintain reperfusion at 24hr (schematic summary, Supplementary Figure 1B).

345  
346 Under these conditions, APS-IgG animals had 2.3-fold larger infarcts compared to HC-IgG  
347 [infarcted % of total brain area, median (IQR) 31.3% (28.2-36.6) versus 13.6% (10.2-18.9),

348 p=0.008; n=5 per group) (Figure 1B-C)]. We singularly noted dark areas in the kidney and liver  
349 in two animals and a third had viscous blood. No other abnormalities or premature death were  
350 seen.

351  
352 For comparison, two additional groups of animals received APS-IgG or HC-IgG but were not  
353 subjected to MCAO (no-MCAO); endpoint was defined as 24hr post-IgG transfer. In brain  
354 lysates prepared from MCAO and no-MCAO groups, human IgG was more abundant in MCAO  
355 compared to no-MCAO tissue, confirming BBB breakdown (Figure 1D). Human IgG levels  
356 were similar in APS-IgG and HC-IgG MCAO brain lysates suggesting that any downstream  
357 differences can be directly attributed to pathogenic aPL found in APS-IgG.

358  
359 Similarly, circulating human IgG was detected in both APS-IgG and HC-IgG treated rats.  
360 Human IgG levels were higher in MCAO compared to no-MCAO littermates and may point  
361 towards IgG retention in the circulation following injury (Figure 1E). In line with this, serum aPL  
362 activity was detectable in APS-IgG treated rats 15min post-injection (Figure 1F) and at  
363 endpoint (Figure 1G-H). While circulating aCL were equally detectable in both MCAO and no-  
364 MCAO APS-IgG littermates (Figure 1G), a $\beta$ 2GPI levels were pronounced in the APS-IgG  
365 MCAO group only (Figure 1H) suggesting greater a $\beta$ 2GPI retention following injury. All HC-  
366 IgG rat sera were aPL negative.

### 367 368 **APS-IgG inhibit pro-survival Akt following brain ischemia-reperfusion injury**

369  
370 Consistent with enhanced infarct size in APS-IgG animals, the apoptotic marker cleaved  
371 caspase-3 was elevated in APS-IgG compared to HC-IgG animals following MCAO, and  
372 minimal or absent in no-MCAO brain lysates (Figure 1I). We assessed whether aPL disrupts  
373 pro-survival mechanisms, key for limiting reperfusion injury and initiating repair.  
374 Phosphorylation of the pro-survival kinase Akt (p-Akt) was measured on its two critical  
375 activation sites (S473, T308); T308 phosphorylation allows initial Akt activation and S473  
376 phosphorylation further enhances its catalytic activity. In the absence of MCAO, p-Akt S473  
377 levels were similar in APS-IgG and HC-IgG animals (Figure 2A, Supplementary Figure 1C).  
378 Following MCAO and as expected, p-Akt S473 levels were higher in HC-IgG treated animals  
379 compared to their no-MCAO littermates, suggesting induction of pro-survival signalling.  
380 However, elevated p-Akt following MCAO was not observed in APS-IgG animals. Comparison  
381 of APS-IgG and HC-IgG MCAO groups revealed strikingly lower phosphorylation at both S473  
382 (Figure 2A, Supplementary Figure 1C) and T308 (Supplementary Figure 1D) in the presence  
383 of aPL. Levels of p-Akt S473 negatively correlated with infarct size highlighting the protective  
384 role of Akt following ischemia-reperfusion injury ( $r = -0.9048$ ,  $p = 0.005$ ; Supplementary Figure  
385 1E). Phosphorylated levels of other key kinases involved in reperfusion signalling were similar  
386 between APS-IgG and HC-IgG animals following MCAO (p38, ERK1/2, JNK1/2;  
387 Supplementary Figure 1F). Taken together, our observations indicate specific inhibition of p-  
388 Akt by aPL following oxygen deprivation-reperfusion.

389  
390 Previous studies highlight the ability of IgG aPL to interfere with Akt signalling. Canaud *et al*  
391 reported aPL-mediated *induction* of p-Akt contributing to endothelial hyperplasia in APS  
392 nephropathy<sup>24</sup> while Sacharidou *et al* demonstrated prothrombotic aPL-mediated *inhibition* via  
393 protein phosphatase 2A (PP2A),<sup>37</sup> one of three molecular Akt inhibitors. We searched for  
394 involvement of the molecular Akt inhibitors PP2A, phosphatase and tensin homolog (PTEN)  
395 and thioesterase superfamily member 4 (*THEM4*, CTMP) in a limited number of brain lysates  
396 from animals subjected to MCAO. Total levels of the PP2A catalytic subunit (PP2AC) and  
397 PTEN did not differ between APS-IgG and HC-IgG groups (Figure 2B, left panel). CTMP was  
398 not detected. Following targeted Akt immunoprecipitation, evidence favouring PP2A  
399 involvement was inconclusive (Figure 2B, right panel and Figure 2C). Instead, an interaction  
400 between Akt and PTEN in APS-IgG animals was detected (Figure 2B, right panel and Figure  
401 2D). Akt-bound PTEN was in an activated form as shown by its dephosphorylated state (Figure  
402 2B, right panel and Figure 2E). Since PTEN degradation following stroke may be



403 neuroprotective,<sup>38</sup> its role and potential manipulation in our model may warrant future  
404 exploration.

405  
406 Next, we studied the catalytic ability of Akt by measuring activation of its downstream  
407 substrates in MCAO brain lysates. Phosphorylated levels of the pro-apoptotic BCL2-  
408 associated agonist of cell death (p-Bad), which is inhibited by Akt phosphorylation on S136,  
409 were reduced in APS-IgG animals (Figure 2F). Consistent with elevated cleaved caspase-3  
410 levels (Figure 1H), a process also regulated by Akt, these observations highlight exacerbated  
411 pro-death signalling in the presence of aPL.

412  
413 Akt supports protein synthesis via phosphorylation of the mammalian target of rapamycin  
414 (mTOR) and its downstream effector S6 ribosomal protein (S6RP). Lower p-S6RP levels were  
415 detected in the APS-IgG group (Akt target site serine-235/6, Figure 2G). This was an intriguing  
416 finding since Canaud *et al* demonstrated elevated p-Akt *and* p-S6RP localized to vascular  
417 endothelium in renal biopsies from APS nephropathy patients compared to non-APS disease  
418 and healthy controls.<sup>24</sup> We probed kidney lysates from our animal model and found that, in  
419 stark contrast to the brain, p-Akt kidney levels were higher in APS-IgG than HC-IgG following  
420 MCAO (Figure 2H, Supplementary Figure 1G). For comparison, we measured p-Akt levels in  
421 the liver and spleen but did not detect any differences suggesting that in our model, aPL  
422 specifically modulated p-Akt in the brain and kidney (Supplementary Figure 1H).

423  
424 The APS nephropathy study suggested that aPL activate Akt in the absence of other stimuli.<sup>24</sup>  
425 Upon challenge with exogenous vascular endothelial growth factor (VEGF, a potent Akt  
426 inducer), aPL were shown to inhibit activation of the vascular homeostatic enzyme endothelial  
427 nitric oxide synthase (eNOS), as demonstrated by reduced phosphorylation of the Akt-  
428 regulated S1177 eNOS residue.<sup>37</sup> We hypothesized that the natural process of Akt induction  
429 following ischemia-reperfusion is challenged by aPL and leads to inhibition of p-eNOS, as  
430 described in the context of VEGF. We probed brain lysates from our model and noted  
431 suppression of p-eNOS in APS-IgG MCAO animals (Figure 2I). In carotid artery specimens  
432 collected from the same animals, a similar pattern of p-Akt and p-eNOS inhibition was seen in  
433 the APS-IgG group while in the aorta, these molecules were inconsistently affected (Figure  
434 2J, p-Akt and Figure 2K, p-eNOS).

### 435 436 **APS-IgG enhance cell death and inhibit Akt following hypoxia-reperfusion in cultured** 437 **endothelial cells**

438  
439 Previous aPL-Akt associated studies focused on endothelium,<sup>24,37</sup> a major aPL target.<sup>7</sup> Given  
440 the importance of endothelial BBB breakdown in stroke, *in vitro* endothelial models were next  
441 employed to confirm our findings. Healthy HUVEC treated with APS-IgG or HC-IgG (24hr)  
442 were exposed to hypoxia under nutrient restricting conditions (0.1% O<sub>2</sub>, 4hr) followed by  
443 reperfusion and nutrient restoration. Cell death was measured in real time for up to 24hr  
444 reperfusion and compared to matched cultures kept in normoxic conditions. Sensitivity of the  
445 cell death assay was confirmed in HUVEC exposed to H<sub>2</sub>O<sub>2</sub> (Supplementary Figure 2A) or  
446 hypoxia-reperfusion (Supplementary Figure 2B). Comparison of APS-IgG vs HC-IgG treated  
447 HUVEC responses revealed a non-significant trend for elevated apoptosis following 2hr  
448 reperfusion (Figure 3A) and significantly elevated necrosis at all time points (Figure 3B),  
449 indicating enhanced endothelial cell death in the presence of aPL.

450  
451 We sought to establish whether aPL influence endothelial Akt *in vitro*, building on evidence  
452 from our *in vivo* observations and from published aPL-endothelial studies.<sup>24,37</sup> Initially, we  
453 tested the same samples used to create pooled IgG for *in vivo* injections (n=2 APS, n=2 HC)  
454 and selected phosphorylated targets were measured after 2hr reperfusion. In untreated  
455 HUVEC, both p-Akt and p-Bad were elevated following hypoxia-reperfusion compared to  
456 normoxia (Supplementary Figure 2C-D). In APS-IgG treated HUVEC, reduced levels of p-Akt,  
457 p-Bad and p-eNOS were detected under hypoxia-reperfusion and compared to HC-IgG

458 treated cells (Figure 3C). Reduced p-Akt induction in the presence of aPL, was confirmed in  
459 an extended sample set of purified IgG (n=12 APS-IgG, n=10 HC-IgG; Table 1) used to treat  
460 matched HUVEC cultures under hypoxia-reperfusion or normoxia (Figure 3D, Supplementary  
461 Figure 2E). These results further highlight that aPL disrupts Akt signalling following a context-  
462 specific insult, in this case hypoxia-reperfusion injury.

463

464

### 464 **APS ECFC response to hypoxia/reperfusion mimics *in vivo* observations**

465

466 Next, we employed *ex vivo* ECFC to study the impact of hypoxia-reperfusion injury on APS  
467 endothelium (n=12 donors per group; Table 1). ECFC from patients with systemic disease  
468 such as APS, are chronically exposed to circulating pathogenic mediators such as  
469 autoantibodies and inflammatory cytokines, ultimately leading to a 'primed' phenotype that  
470 persists *ex vivo*.<sup>31,39</sup> Utilising APS ECFC in our study would therefore facilitate extension of  
471 our *in vivo* and *in vitro* findings to a biologically relevant source of patient endothelium.

472

473 ECFC generation parameters as outlined by ECFC standardization guidelines<sup>40</sup> including  
474 number of endothelial colonies detected, day of first colony detection and day of first passage  
475 from P0 to P1 (defined as days-post PBMC seeding), were similar for APS and HC ECFC  
476 (Supplementary Figure 3D) suggesting that any functional or molecular differences detected  
477 were not due to initial isolation and growth capacity of patient vs control cells.

478

479 All experiments were performed in parallel matched hypoxia-reperfusion and normoxic  
480 cultures. Mirroring the HUVEC-IgG experiments, ECFC were exposed to hypoxia and cell  
481 death was tracked in real time for 24hr post reperfusion. Hypoxia-reperfusion promoted cell  
482 death in both APS and HC ECFC compared to normoxic cells (Figure 4A-B, Supplementary  
483 Figure 4A-B). Both apoptosis (Figure 4A) and necrosis (Figure 4B) were significantly more  
484 prominent in APS-ECFC.

485

486 Dysregulation of the p-Akt response following hypoxia-reperfusion was next determined.  
487 Induction of p-Akt was observed in both APS and HC ECFC following hypoxia-reperfusion and  
488 compared to matched cells kept under normoxia (Supplementary Figure 4C). However, p-Akt  
489 levels were robustly lower in APS-ECFC compared to HC-ECFC at both 0.5hr (early) and 2hr  
490 (late) post-reperfusion, as well as under normoxic conditions (Figure 4C). Failure to activate  
491 Akt resulted in the expected reduction of downstream p-Bad in APS ECFC (Figure 4D,  
492 Supplementary Figure 4D). In agreement with the regulatory relationship between Akt and  
493 Bad, early p-Akt correlated with late p-Bad (r=0.622, p=0.035; Supplementary Figure 4E).  
494 Thus, our *ex vivo* findings in APS and HC ECFC recapitulated our *in vivo* observations and  
495 the *in vitro* IgG-HUVEC model.

496

### 497 **Hydroxychloroquine partially protects against hypoxia-reperfusion induced ECFC 498 death**

499

500 Our group and others reported a protective effect for hydroxychloroquine (HCQ) following  
501 brain,<sup>41</sup> heart<sup>42,43</sup> and kidney<sup>44</sup> ischemia-reperfusion injury *in vivo* and in cellular models.<sup>42,44</sup>  
502 We determined whether HCQ could reverse ECFC death following hypoxia-reperfusion. Cells  
503 were pre-treated with HCQ for 24hr followed by hypoxia-reperfusion or normoxic culture as  
504 described. Under normoxic conditions, HCQ had a variable effect on apoptosis and necrosis  
505 (Supplementary Figure 5A-B). Following reperfusion, HCQ suppressed apoptosis (Figure 5A)  
506 and necrosis (Figure 5B) in both APS and HC ECFC but yielded a stronger protective effect  
507 upon APS ECFC death.

508

509 We measured p-Akt and p-Bad levels in a small sample set (n=3 per group); p-Akt levels were  
510 similar between untreated and HCQ-treated lysates (data not shown) but p-Bad levels  
511 appeared to rise following HCQ treatment and hypoxia-reperfusion (Figure 5C, Supplementary

512 Figure 5C). Taken together, our results suggest that HCQ limits cell death during reperfusion  
513 in both APS and non-APS cellular sources but its beneficial effects may be enhanced in APS.

514

515 In this study, ECFC from thrombotic APS patients with or without a previous history of  
516 cardiovascular events (CVE vs no-CVE) were used. Comparison of ECFC responses from  
517 these two APS subgroups showed equal susceptibility to hypoxia-reperfusion induced cell  
518 death (Supplementary Figure 5D). However, *in vitro* treatment with HCQ conferred greater  
519 protection in ECFC from no-CVE compared to CVE donors (Figure 5D). Similarly, ECFC  
520 responses were compared between patients receiving HCQ compared to those not receiving  
521 HCQ at the time of ECFC isolation (HCQ vs no-HCQ). No differences in the level of cell death  
522 (Supplementary Figure 5E) or response to *in vitro* HCQ treatment was observed  
523 (Supplementary Figure 5F).

524

## 525 **Discussion**

526

527 To our knowledge, we present the first *in vivo* model for aPL-mediated cell death following  
528 ischemia-reperfusion injury and identify repression of Akt activity as a critical underlying  
529 mechanism. We confirm elevated cell death and reduced p-Akt *in vitro* in HUVEC stimulated  
530 with exogenous aPL and subjected to hypoxia-reperfusion. Excitingly, use of *ex vivo* APS  
531 ECFC fully recapitulated our *in vivo* observations thus directly extending our findings to a  
532 patient-relevant source of endothelium.

533

534 Stroke is the most frequent primary arterial thrombotic event in APS and the most frequent  
535 recurrent thrombotic event overall (venous and arterial combined).<sup>45-47</sup> While the relationship  
536 between aPL and stroke is well-established, few studies have compared stroke severity and  
537 long-term outcomes between APS and non-APS stroke patients, a particularly challenging  
538 task as APS strokes occur in younger patients. A study in patients <54 years old identified a  
539 correlation between aPL titres, stroke severity on admission and three-month outcomes.<sup>28</sup>  
540 Another study found that cognitive impairment was more common in APS patients compared  
541 to age-, gender- and cardiovascular risk factor-matched controls; within one year of follow-up,  
542 progression of cognitive impairment occurred in ~21% of APS patients (13/60), 12 of whom  
543 had suffered stroke.<sup>29</sup> Higher risk of haemorrhagic transformation post APS-associated stroke  
544 regardless of thrombolytic therapy was also reported; APS patients spent longer periods in  
545 hospital and had a greater risk of mortality despite being significantly younger compared to  
546 non-APS stroke patients.<sup>30</sup>

547

548 Here, we investigated the impact of aPL in a vascular event setting such as stroke, focusing  
549 on the critical period following clot dissolution and brain reperfusion by employing a non-  
550 thrombotic outcome. Our study highlights an additional pathogenic effect of aPL that goes  
551 beyond lowering the threshold for arterial thrombosis and describes a mechanism for  
552 enhanced tissue injury during the reperfusion phase, which may account for the worse  
553 prognosis proposed in APS-associated stroke. Patients may benefit from close monitoring,  
554 particularly if thrombolysis is given, and incorporating readouts for disability and cognitive  
555 impairment during long-term follow up.

556

557 We propose that aPL, free to enter the brain following BBB breakdown, impact Akt-mediated  
558 homeostatic mechanisms critical to cell survival during reperfusion. Analysis of limited material  
559 from our *in vivo* model may indicate a role for the tumour suppressor PTEN in aPL-mediated  
560 Akt inhibition. This was a surprising finding as PTEN acts upstream of Akt to prevent activation  
561 of phosphoinositide 3-kinase (PI3K)-Akt signalling and may indicate the presence of an  
562 inhibitory complex composed of Akt, PTEN and other PI3K signalling components recruited to  
563 sites near the plasma membrane.

564

565 Another unexpected finding was that, following stroke, renal p-Akt levels were elevated in  
566 APS-IgG compared to HC-IgG animals, an observation that agrees with an elegant study for

567 APS nephropathy.<sup>24</sup> In the absence of stroke, p-Akt levels did not differ between APS-IgG and  
568 HC-IgG kidney or brain. We speculate that, similar to the ‘two-hit’ model for thrombotic APS,  
569 the presence of circulating aPL combined with the haemodynamic impact of MCA occlusion  
570 influences the renal system in our model and drives renal Akt activation.

571  
572 Both the APS nephropathy study and a second *in vivo* thrombosis model study implicate  
573 dysregulation of Akt and its signalling mediators in endothelium, but in opposing ways –  
574 suggesting activation<sup>24</sup> and inhibition<sup>37</sup> respectively. A key difference between these two  
575 studies was the use of exogenous VEGF (a potent Akt inducer) in the latter,<sup>37</sup> suggesting that  
576 aPL may prevent Akt activation following biomechanical challenge. Harnessing this  
577 information, we sought to understand the premise of aPL-mediated Akt dysregulation in the  
578 presence of an Akt-activating stimulus such as hypoxia-reperfusion. We focused on  
579 endothelium, initially showing reduced p-eNOS levels (a downstream Akt target) in brain and  
580 carotid artery specimens from APS-IgG animals. A series of *in vitro* experiments corroborated  
581 our *in vivo* findings, whereby aPL repressed Akt activation following *in vitro* hypoxia-  
582 reperfusion. We utilized two sources of endothelial cells: HUVEC treated with APS-IgG (the  
583 most common *in vitro* model for aPL-endothelial studies) and ECFC isolated from patients.

584  
585 ECFC, considered to originate from true circulating endothelial ‘progenitors’, are capable of  
586 clonal expansion and vascular repair, and appear to be ‘biologically primed’ even after long  
587 term *in vitro* culture. This precious source of patient endothelium has offered mechanistic  
588 insight into endothelial dysfunction across a range of diseases,<sup>31</sup> including rheumatoid arthritis  
589 where ECFC were shown to be hyperproliferative, proangiogenic and sensitized to TNF $\alpha$   
590 stimulation.<sup>39</sup> Here, we utilise APS ECFC for the first time to demonstrate that both functional  
591 (cell death) and molecular (Akt) outcomes are negatively impacted under hypoxia-reperfusion,  
592 mirroring our *in vivo* observations and underlining the utility of ECFC for the exploration of  
593 endothelial dysfunction in APS.

594  
595 Our study has some limitations. Our model follows a standard approach of passive transfer of  
596 aPL *in vivo* to study APS pathogenesis (‘acute’ APS models). ‘Chronic’ APS models involving  
597 immunisation with cardiolipin or  $\beta$ 2GPI, are less common but mimic observations from acute  
598 models. We used a small number of animals for our *in vivo* model and a moderate number of  
599 patients (purified IgG and ECFC) to confirm our findings. *In vivo* experiments employed pooled  
600 IgG isolated from two APS and four HC donors. For comparison, our previous studies<sup>9,13,21</sup>  
601 and those by other groups<sup>11,12,48</sup> also tested a small number of individual APS-IgG or HC-IgG  
602 samples in animal models, ranging from 1-6 samples per group. We previously used pooled  
603 HC-IgG *in vivo*<sup>9,13</sup> and pooled APS-IgG and HC-IgG *in vitro* with downstream individual sample  
604 validation.<sup>22,49</sup> Another limitation is that we did not explore reversal of the Akt response with  
605 commercially available pan-Akt activators as they are unlikely to be employed in real world  
606 clinical practice.

607  
608 Despite these limitations, we demonstrate consistency across our findings and present novel  
609 *in vivo* and *ex vivo* ECFC-based models for oxygen deprivation-reperfusion injury in APS.  
610 Future work will aim to establish how aPL-mediated functional and molecular disturbances  
611 can be therapeutically reversed. We previously reported on the pro-survival effect of HCQ in  
612 an *in vivo* cardiac ischemia-reperfusion model and in cardiomyocytes *in vitro*.<sup>42</sup> This effect was  
613 mediated by ERK and not Akt, but serves as an example of repurposing or reconsidering the  
614 benefits of pre-existing drugs already used in autoimmune disease management. Here, using  
615 blood-derived ECFC we provide proof-of-principle that HCQ may offer protection against cell  
616 death following hypoxia-reperfusion, an effect that is more pronounced in APS compared to  
617 HC ECFC. Incorporating HCQ as an adjunct immunomodulatory treatment in APS  
618 management is increasingly implemented, and may provide similar benefits to those seen in  
619 systemic lupus erythematosus and rheumatoid arthritis where HCQ is proposed to reduce  
620 cardiovascular risk.<sup>50</sup>

621 In conclusion, we translate biological evidence generated from a novel *in vivo* APS stroke  
622 model to *in vitro* studies with aPL-treated HUVEC and finally, to APS-derived *ex vivo* EC. We  
623 identify an intervenable pathobiological process independent of thrombosis that may inform  
624 clinical management of patients with aPL and stroke. Further research is required to establish  
625 whether aPL-mediated Akt disturbances can be manipulated therapeutically and the efficacy  
626 of immunomodulation towards thrombotic and non-thrombotic pathogenesis in APS.

627

### 628 **Acknowledgments**

629 This manuscript is dedicated to Professor Justin Mason (Imperial College London) and  
630 Professor Silvia Pierangeli (University of Texas Medical Branch) who passed away  
631 prematurely. We are sincerely grateful to Mrs Valerie Taylor (University College London) for  
632 sharing her expertise and supporting the *in vivo* part of this study. Infrastructure support for  
633 this research was provided by the NIHR Imperial Biomedical Research Centre (BRC).

634

### 635 **Sources of Funding**

636 C.P is supported by Versus Arthritis (21223) and the Imperial College-Wellcome Trust  
637 Institutional Strategic Support Fund. D.J.S. was supported by British Heart Foundation  
638 Intermediate and Senior Basic Science Research Fellowships (FS/15/33/31608,  
639 FS/SBSRF/21/31020), the BHF Centre for Regenerative Medicine (RM/17/1/33377), the MRC  
640 (MR/R026416/1) and the Wellcome Trust (212937/Z/18/Z). D.J.A is funded by the MRC  
641 (MR/V037633/1). This work was partly funded by the Rosetrees Trust (C.P, I.P.G).

642

### 643 **Disclosures**

644 C.P, A.R, I.P.G and Y.I are co-inventors on a novel drug for APS (US20160287718A). There  
645 are no other relevant disclosures.

646

### 647 **References**

- 648 1. Collaborators GBDS. Global, regional, and national burden of stroke, 1990-2016: a  
649 systematic analysis for the Global Burden of Disease Study 2016. *Lancet Neurol*  
650 2019;18(5):439-58.
- 651 2. Sciascia S, Sanna G, Khamashta MA, et al. The estimated frequency of antiphospholipid  
652 antibodies in young adults with cerebrovascular events: a systematic review. *Ann Rheum Dis*  
653 2015;74(11):2028-33.
- 654 3. George MG. Risk Factors for Ischemic Stroke in Younger Adults: A Focused Update. *Stroke*  
655 2020;51(3):729-35.
- 656 4. Barbhaiya M, Zully S, Naden R, et al. 2023 ACR/EULAR antiphospholipid syndrome  
657 classification criteria. *Ann Rheum Dis* 2023;82(10):1258-70.
- 658 5. Pezzini A, Grassi M, Lodigiani C, et al. Predictors of long-term recurrent vascular events  
659 after ischemic stroke at young age: the Italian Project on Stroke in Young Adults. *Circulation*  
660 2014;129(16):1668-76.
- 661 6. Muller-Calleja N, Kohler A, Siebald B, et al. Cofactor-independent antiphospholipid  
662 antibodies activate the NLRP3-inflammasome via endosomal NADPH-oxidase: implications  
663 for the antiphospholipid syndrome. *Thromb Haemost* 2015;113(5):1071-83.
- 664 7. Meroni PL, Borghi MO, Raschi E, Tedesco F. Pathogenesis of antiphospholipid syndrome:  
665 understanding the antibodies. *Nat Rev Rheumatol* 2011;7(6):330-9.
- 666 8. Pierangeli SS, Liu SW, Anderson G, Barker JH, Harris EN. Thrombogenic properties of  
667 murine anti-cardiolipin antibodies induced by beta 2 glycoprotein 1 and human  
668 immunoglobulin G antiphospholipid antibodies. *Circulation* 1996;94(7):1746-51.
- 669 9. Pierangeli SS, Colden-Stanfield M, Liu X, Barker JH, Anderson GL, Harris EN.  
670 Antiphospholipid antibodies from antiphospholipid syndrome patients activate endothelial cells  
671 in vitro and in vivo. *Circulation* 1999;99(15):1997-2002.
- 672 10. Jankowski M, Vreys I, Wittevrongel C, et al. Thrombogenicity of beta 2-glycoprotein I-  
673 dependent antiphospholipid antibodies in a photochemically induced thrombosis model in the  
674 hamster. *Blood* 2003;101(1):157-62.

- 675 11. Fischetti F, Durigutto P, Pellis V, et al. Thrombus formation induced by antibodies to beta2-  
676 glycoprotein I is complement dependent and requires a priming factor. *Blood*  
677 2005;106(7):2340-6.
- 678 12. Arad A, Proulle V, Furie RA, Furie BC, Furie B. beta(2)-Glycoprotein-1 autoantibodies from  
679 patients with antiphospholipid syndrome are sufficient to potentiate arterial thrombus formation  
680 in a mouse model. *Blood* 2011;117(12):3453-9.
- 681 13. Pericleous C, Ruiz-Limon P, Romay-Penabad Z, et al. Proof-of-concept study  
682 demonstrating the pathogenicity of affinity-purified IgG antibodies directed to domain I of  
683 beta2-glycoprotein I in a mouse model of anti-phospholipid antibody-induced thrombosis.  
684 *Rheumatology (Oxford)* 2015;54(4):722-7.
- 685 14. Meng H, Yalavarthi S, Kanthi Y, et al. In Vivo Role of Neutrophil Extracellular Traps in  
686 Antiphospholipid Antibody-Mediated Venous Thrombosis. *Arthritis Rheumatol*  
687 2017;69(3):655-67.
- 688 15. Armstrong SC. Protein kinase activation and myocardial ischemia/reperfusion injury.  
689 *Cardiovasc Res* 2004;61(3):427-36.
- 690 16. Zhao H, Sapolsky RM, Steinberg GK. Phosphoinositide-3-kinase/akt survival signal  
691 pathways are implicated in neuronal survival after stroke. *Mol Neurobiol* 2006;34(3):249-70.
- 692 17. Sun J, Nan G. The Mitogen-Activated Protein Kinase (MAPK) Signaling Pathway as a  
693 Discovery Target in Stroke. *J Mol Neurosci* 2016;59(1):90-8.
- 694 18. Aronovich R, Gurwitz D, Kloog Y, Chapman J. Antiphospholipid antibodies, thrombin and  
695 LPS activate brain endothelial cells and Ras-dependent pathways through distinct  
696 mechanisms. *Immunobiology* 2005;210(10):781-8.
- 697 19. Vega-Ostertag M, Casper K, Swerlick R, Ferrara D, Harris EN, Pierangeli SS. Involvement  
698 of p38 MAPK in the up-regulation of tissue factor on endothelial cells by antiphospholipid  
699 antibodies. *Arthritis Rheum* 2005;52(5):1545-54.
- 700 20. Lopez-Pedraza C, Buendia P, Cuadrado MJ, et al. Antiphospholipid antibodies from  
701 patients with the antiphospholipid syndrome induce monocyte tissue factor expression through  
702 the simultaneous activation of NF-kappaB/Rel proteins via the p38 mitogen-activated protein  
703 kinase pathway, and of the MEK-1/ERK pathway. *Arthritis Rheum* 2006;54(1):301-11.
- 704 21. Vega-Ostertag ME, Ferrara DE, Romay-Penabad Z, et al. Role of p38 mitogen-activated  
705 protein kinase in antiphospholipid antibody-mediated thrombosis and endothelial cell  
706 activation. *J Thromb Haemost* 2007;5(9):1828-34.
- 707 22. Lambrianides A, Carroll CJ, Pierangeli SS, et al. Effects of polyclonal IgG derived from  
708 patients with different clinical types of the antiphospholipid syndrome on monocyte signaling  
709 pathways. *J Immunol* 2010;184(12):6622-8.
- 710 23. Zhou H, Chen D, Xie H, et al. Activation of MAPKs in the anti-beta2GPI/beta2GPI-induced  
711 tissue factor expression through TLR4/IRAKs pathway in THP-1 cells. *Thromb Res*  
712 2012;130(4):e229-35.
- 713 24. Canaud G, Bienaime F, Tabarin F, et al. Inhibition of the mTORC pathway in the  
714 antiphospholipid syndrome. *N Engl J Med* 2014;371(4):303-12.
- 715 25. Bourke LT, McDonnell T, McCormick J, et al. Antiphospholipid antibodies enhance rat  
716 neonatal cardiomyocyte apoptosis in an in vitro hypoxia/reoxygenation injury model via p38  
717 MAPK. *Cell Death Dis* 2017;8(1):e2549.
- 718 26. Agostinis C, Biffi S, Garrovo C, et al. In vivo distribution of beta2 glycoprotein I under  
719 various pathophysiologic conditions. *Blood* 2011;118(15):4231-8.
- 720 27. Grossi C, Artusi C, Meroni P, et al. beta2 glycoprotein I participates in phagocytosis of  
721 apoptotic neurons and in vascular injury in experimental brain stroke. *J Cereb Blood Flow*  
722 *Metab* 2021;41(8):2038-53.
- 723 28. Rodriguez-Sanz A, Martinez-Sanchez P, Prefasi D, et al. Antiphospholipid antibodies  
724 correlate with stroke severity and outcome in patients with antiphospholipid syndrome.  
725 *Autoimmunity* 2015;48(5):275-81.
- 726 29. Medina G, Cime-Ake E, Bonilla-Vazquez R, et al. Disability and cognitive impairment are  
727 interdependent in primary antiphospholipid syndrome. *Lupus* 2022;31(9):1104-13.

- 728 30. Mehta T, Hussain M, Sheth K, Ding Y, McCullough LD. Risk of hemorrhagic transformation  
729 after ischemic stroke in patients with antiphospholipid antibody syndrome. *Neurol Res*  
730 2017;39(6):477-83.
- 731 31. Paschalaki KE, Randi AM. Recent Advances in Endothelial Colony Forming Cells Toward  
732 Their Use in Clinical Translation. *Front Med (Lausanne)* 2018;5:295.
- 733 32. Giles I, Pericleous C, Liu X, et al. Thrombin binding predicts the effects of sequence  
734 changes in a human monoclonal antiphospholipid antibody on its in vivo biologic actions. *J*  
735 *Immunol* 2009;182(8):4836-43.
- 736 33. Pericleous C, Ferreira I, Borghi O, et al. Measuring IgA Anti-beta2-Glycoprotein I and  
737 IgG/IgA Anti-Domain I Antibodies Adds Value to Current Serological Assays for the  
738 Antiphospholipid Syndrome. *PLoS One* 2016;11(6):e0156407.
- 739 34. Devreese KMJ, de Groot PG, de Laat B, et al. Guidance from the Scientific and  
740 Standardization Committee for lupus anticoagulant/antiphospholipid antibodies of the  
741 International Society on Thrombosis and Haemostasis: Update of the guidelines for lupus  
742 anticoagulant detection and interpretation. *J Thromb Haemost* 2020;18(11):2828-39.
- 743 35. Badin RA, Modo M, Cheetham M, et al. Protective effect of post-ischaemic viral delivery  
744 of heat shock proteins in vivo. *J Cereb Blood Flow Metab* 2009;29(2):254-63.
- 745 36. Panizzo RA, Gadian DG, Sowden JC, Wells JA, Lythgoe MF, Ferretti P. Monitoring  
746 ferumoxide-labelled neural progenitor cells and lesion evolution by magnetic resonance  
747 imaging in a model of cell transplantation in cerebral ischaemia. *F1000Res* 2013;2:252.
- 748 37. Sacharidou A, Chambliss KL, Ulrich V, et al. Antiphospholipid antibodies induce  
749 thrombosis by PP2A activation via apoER2-Dab2-SHC1 complex formation in endothelium.  
750 *Blood* 2018;131(19):2097-110.
- 751 38. Li W, Huang R, Chen Z, Yan LJ, Simpkins JW, Yang SH. PTEN degradation after ischemic  
752 stroke: a double-edged sword. *Neuroscience* 2014;274:153-61.
- 753 39. Leblond A, Pezet S, Cauvet A, et al. Implication of the deacetylase sirtuin-1 on synovial  
754 angiogenesis and persistence of experimental arthritis. *Ann Rheum Dis* 2020;79(7):891-900.
- 755 40. Smadja DM, Melero-Martin JM, Eikenboom J, Bowman M, Sabatier F, Randi AM.  
756 Standardization of methods to quantify and culture endothelial colony-forming cells derived  
757 from peripheral blood: Position paper from the International Society on Thrombosis and  
758 Haemostasis SSC. *J Thromb Haemost* 2019;17(7):1190-94.
- 759 41. Babataheri S, Malekinejad H, Mosarrezai A, Soraya H. Pre-treatment or post-treatment  
760 with hydroxychloroquine demonstrates neuroprotective effects in cerebral  
761 ischemia/reperfusion. *Fundam Clin Pharmacol* 2022
- 762 42. Bourke L, McCormick J, Taylor V, et al. Hydroxychloroquine Protects against Cardiac  
763 Ischaemia/Reperfusion Injury In Vivo via Enhancement of ERK1/2 Phosphorylation. *PLoS*  
764 *One* 2015;10(12):e0143771.
- 765 43. Marsh KM, Rastogi R, Zhang A, Wu D, Kron IL, Yang Z. Hydroxychloroquine Attenuates  
766 Myocardial Ischemic and Post-Ischemic Reperfusion Injury by Inhibiting the Toll-Like Receptor  
767 9 - Type I Interferon Pathway. *Cardiol Cardiovasc Med* 2022;6(4):416-23.
- 768 44. Tang TT, Lv LL, Pan MM, et al. Hydroxychloroquine attenuates renal ischemia/reperfusion  
769 injury by inhibiting cathepsin mediated NLRP3 inflammasome activation. *Cell Death Dis*  
770 2018;9(3):351.
- 771 45. Cervera R, Piette JC, Font J, et al. Antiphospholipid syndrome: clinical and immunologic  
772 manifestations and patterns of disease expression in a cohort of 1,000 patients. *Arthritis*  
773 *Rheum* 2002;46(4):1019-27.
- 774 46. Cervera R, Khamashta MA, Shoenfeld Y, et al. Morbidity and mortality in the  
775 antiphospholipid syndrome during a 5-year period: a multicentre prospective study of 1000  
776 patients. *Ann Rheum Dis* 2009;68(9):1428-32.
- 777 47. Cervera R, Serrano R, Pons-Estel GJ, et al. Morbidity and mortality in the antiphospholipid  
778 syndrome during a 10-year period: a multicentre prospective study of 1000 patients. *Ann*  
779 *Rheum Dis* 2015;74(6):1011-8.
- 780 48. Proulle V, Furie RA, Merrill-Skoloff G, Furie BC, Furie B. Platelets are required for  
781 enhanced activation of the endothelium and fibrinogen in a mouse thrombosis model of APS.  
782 *Blood* 2014;124(4):611-22.

- 783 49. Ripoll VM, Lambrianides A, Pierangeli SS, et al. Changes in regulation of human monocyte  
784 proteins in response to IgG from patients with antiphospholipid syndrome. *Blood*  
785 2014;124(25):3808-16.
- 786 50. Arachchilage DJ, Laffan M, Pericleous C. Hydroxychloroquine as an Immunomodulatory  
787 and Antithrombotic Treatment in Antiphospholipid Syndrome. *Int J Mol Sci* 2023;24(2)  
788



789 **Tables**

790

791

**Table 1: Demographics and clinical characteristics of sampled cohort.**

|                                              | IgG- <i>in vivo</i> |                 | IgG-HUVEC       |                 | ECFC               |                 |
|----------------------------------------------|---------------------|-----------------|-----------------|-----------------|--------------------|-----------------|
|                                              | APS<br>(n=2)        | HC<br>(n=4)     | APS<br>(n=14)   | HC<br>(n=12)    | APS<br>(n=12)      | HC<br>(n=12)    |
| Age, yrs<br>[Median (Range)]                 | 35.5<br>(34-37)     | 30.5<br>(29-37) | 51.0<br>(34-68) | 45.5<br>(29-61) | 59<br>(25-81)      | 41.5<br>(28-61) |
| Female                                       | 2<br>(100%)         | 4<br>(100%)     | 10 (71%)        | 10 (83%)        | 8 (67%)            | 8 (67%)         |
| Ethnicity*                                   | 2W                  | 4W              | 12W, 1A,<br>1O  | 12W             | 8W, 1A,<br>1Ar, 1O | 10W, 1A,<br>1B  |
| <b>Clinical history<sup>†</sup> (%)</b>      |                     |                 |                 |                 |                    |                 |
| Transient ischemic attack                    | -                   |                 | 1 (7%)          |                 | 3 (25%)            |                 |
| Stroke                                       | 1 (50%)             |                 | 10 (71%)        |                 | 6 (50%)            |                 |
| Myocardial Infarction                        | -                   |                 | 2 (14%)         |                 | 1 (8%)             |                 |
| Other Arterial Thrombosis                    | -                   |                 | 2 (14%)         |                 | 3 (25%)            |                 |
| Deep Vein Thrombosis                         | -                   |                 | 3 (21%)         |                 | 4 (33%)            |                 |
| Pulmonary Embolism                           | -                   |                 | 2 (14%)         |                 | 2 (17%)            |                 |
| Other Venous Thrombosis                      | -                   |                 | 1 (7%)          |                 | 3 (25%)            |                 |
| Pregnancy morbidity <sup>‡</sup>             | 1 (50%)             |                 | 3 (30%)         |                 | 1 (13%)            |                 |
| Catastrophic APS                             | 1 (50%)             |                 | 1 (7%)          |                 | -                  |                 |
| Thrombocytopenia                             | -                   |                 | 1 (7%)          |                 | 1 (8%)             |                 |
| SLE-APS <sup>§</sup>                         | 1 (50%)             |                 | 3 (21%)         |                 | -                  |                 |
| <b>aPL serology (%)</b>                      |                     |                 |                 |                 |                    |                 |
| Lupus anticoagulant                          | 2<br>(100%)         |                 | 11 (79%)        |                 | 10 (83%)           |                 |
| IgG anticardiolipin <sup>#</sup>             | 2<br>(100%)         |                 | 13 (93%)        |                 | 7 (58%)            |                 |
| IgG anti- $\beta_2$ GPI <sup>#</sup>         | 2<br>(100%)         |                 | 10 (71%)        |                 | 7 (58%)            |                 |
| Triple positive                              | 2<br>(100%)         |                 | 11 (79%)        |                 | 5 (42%)            |                 |
| <b>Treatment (%)</b>                         |                     |                 |                 |                 |                    |                 |
| Warfarin                                     | 2<br>(100%)         |                 | 12 (86%)        |                 | 10 (83%)           |                 |
| Anti-platelet (including aspirin)            | -                   |                 | 5 (36%)         |                 | 8 (67%)            |                 |
| Hydroxychloroquine                           | -                   |                 | 6 (43%)         |                 | 7 (58%)            |                 |
| ACEi/ARBs, Ca <sup>2+</sup> /beta-blockers** | -                   |                 | 4 (29%)         |                 | 7 (58%)            |                 |
| Statins                                      | -                   |                 | 2 (14%)         |                 | 6 (50%)            |                 |

792 \* W, White; A, Asian; Ar, Arab; B, Black; O, any other ethnic group

793 † Multiple events for some patients

794 ‡ Percentage of female patients with pregnancy morbidity

795 §SLE, systemic lupus erythematosus (secondary APS). No incidence of other rheumatic  
796 diseases.

797 #aPL titres >20GPLU for IgG anti-cardiolipin, >8GBU for IgG anti- $\beta_2$ GPI tested in-house  
 798 \*\*ACEi, angiotensin-converting enzyme inhibitors; ARBs, angiotensin receptor blockers;  
 799 Ca<sup>2+</sup>, calcium channel blockers

800  
 801

**Supplementary Table 1. List of antibodies.**

|                                                 | Target Species   | Host   | Dilution   | Supplier                        | Catalogue number |
|-------------------------------------------------|------------------|--------|------------|---------------------------------|------------------|
| <b>Immunoblot, primary antibody</b>             |                  |        |            |                                 |                  |
| Cleaved caspase 3                               | Human/Rodent     | Rabbit | 1:1000     | Cell Signaling Technology (CST) |                  |
| p-Akt S473                                      | Human/Rodent     | Rabbit | 1:1000     | CST                             | 4070             |
| p-Akt T308                                      | Human/Rodent     | Rabbit | 1:1000     | CST                             | 13038            |
| p-Bad S136                                      | Human/Rodent     | Rabbit | 1:1000     | CST                             | 4366/5286        |
| p-eNOS S1177                                    | Human/Bovine/Pig | Rabbit | 1:1000     | CST                             | 9571             |
| p-S6RP                                          | Human/Rodent     | Rabbit | 1:5000     | CST                             | 4858             |
| Akt                                             | Human/Rodent     | Rabbit | 1:5000     | CST                             | 4685             |
| Akt                                             | Human/Rodent     | Mouse  | 1:5000     | CST                             | 2920             |
| $\beta$ -actin                                  | Human/Rodent     | Mouse  | 1:10000    | CST                             | 3700             |
| Bad                                             | Human/Rodent     | Rabbit | 1:1000     | CST                             | 9292             |
| GAPDH                                           | Human/Rodent     | Rabbit | 1:10000    | CST                             | 2118             |
| PP2AC                                           | Human/Rodent     | Rabbit | 1:1000     | CST                             | 2038             |
| PTEN                                            | Human/Rodent     | Rabbit | 1:1000     | CST                             | 9188             |
| np-PTEN                                         | Human/Rodent     | Rabbit | 1:1000     | CST                             | 7960             |
| S6RP                                            | Human/Rodent     | Rabbit | 1:5000     | CST                             | 2217             |
| vinculin                                        | Human/Rodent     | Rabbit | 1:10000    | CST                             | 13901            |
| <b>Immunoprecipitation, capture antibody</b>    |                  |        |            |                                 |                  |
| Akt                                             | Human            | Rabbit | 1:40       | CST                             | 4685             |
| <b>Immunoblot, secondary/detection antibody</b> |                  |        |            |                                 |                  |
| Anti-rabbit IgG, horseradish peroxidase         | Rabbit           | Swine  | 1:5000     | Dako                            | P039901          |
| Anti-mouse IgG, horseradish peroxidase          | Mouse            | Goat   | 1:5000     | Dako                            | P044701          |
| Anti-rabbit IgG, DyLight™ 800-4x PEG            | Rabbit           | Goat   | 1:5000     | ThermoFisher                    | SA5-35571        |
| Anti-mouse IgG, AF680                           | Mouse            | Goat   | 1:10000    | ThermoFisher                    | A32729           |
| Anti-rabbit IgG, conformation specific          | Rabbit           | Mouse  | 1:2000     | CST                             | 5127             |
| <b>ECFC purity, flow cytometry</b>              |                  |        |            |                                 |                  |
| CD144 PE                                        | Human            | Mouse  | 10 $\mu$ L | EBioscience                     | 12-1449-82       |
| CD146 BV421                                     | Human            | Mouse  | 5 $\mu$ L  | Biolegend                       | 361004           |
| CD31 FITC                                       | Human            | Mouse  | 5 $\mu$ L  | Biolegend                       | 303104           |
| CD45 BV510                                      | Human            | Mouse  | 5 $\mu$ L  | Biolegend                       | 368526           |
| CD14 APC                                        | Human            | Mouse  | 5 $\mu$ L  | Biolegend                       | 301808           |
| Zombie NIR™ Fixable Viability Dye               | -                | -      | 1:375      | Biolegend                       | 423106           |

802

## 803 **Figure Legends**

804  
805 **Figure 1. aPL enhance brain injury following ischemia-reperfusion *in vivo*.** Rats injected  
806 with 1mg human IgG were subjected to transient middle cerebral artery occlusion (MCAO)  
807 followed by reperfusion (n=5-8 APS-IgG; n=5-6 HC-IgG). An additional litter of rats were  
808 injected with APS-IgG or HC-IgG but not subjected to MCAO (no-MCAO, n=6 per group). **(A)**  
809 MCAO was performed for 1hr and reperfusion for 24hr (n=8 APS-IgG; n=6 HC-IgG). A total of  
810 3/8 APS mice died before endpoint (2/3 with completed histology are marked as red  
811 diamonds). Analysis was performed after excluding animals that died pre-endpoint. **(B)** MCAO  
812 was reduced to 0.5hr followed by reperfusion for 24hr (n=5 per group). Rats administered  
813 APS-IgG had significantly larger infarcts at endpoint. **(C)** Example image of brain slices  
814 stained with tetrazolium chloride (TTC) to discriminate between metabolically active (red) and  
815 dead tissue (white). **(D-E)** Higher levels of human IgG were detected in **(D)** brain lysates and  
816 **(E)** serum from MCAO compared to no-MCAO littermates. **(F)** Fifteen minutes post IgG  
817 injection and prior to MCAO, rat serum was sampled for IgG aPL activity. Both aCL and anti-  
818  $\beta$ 2GPI were detected. **(G-H)** At endpoint, APS-IgG MCAO rat sera were **(G)** aCL and **(H)** anti-  
819  $\beta$ 2GPI positive. aCL were also detected in APS-IgG no-MCAO littermates. aPL were  
820 undetectable in HC-IgG rats. **(I)** Activation/cleavage of caspase-3 was evident in MCAO brain  
821 tissue and was higher in the APS-IgG group (n=3 per group). Normalised to GAPDH. \*p<0.05;  
822 \*\*p<0.01; \*\*\*p<0.001; \*\*\*\*p<0.0001; ns, non-significant.

823  
824 **Figure 2. aPL dysregulate the pro-survival kinase Akt.** **(A)** Following ischemia-reperfusion  
825 injury, HC-IgG animals demonstrated increased phosphorylation of Akt (p-Akt S473) in the  
826 brain. In comparison, p-Akt was lower in APS-IgG animals (n=4 MCAO, n=6 no-MCAO per  
827 IgG group). **(B-E)** Levels of natural Akt inhibitors PP2A(C, catalytic subunit), PTEN and active  
828 PTEN (non-phosphorylated, np-PTEN) were unaltered in the two MCAO groups. Whole  
829 lysates **(B, left panel)** or Akt-immunoprecipitated lysates **(B, right panel)** were blotted for **(C)**  
830 PP2AC, **(D)** PTEN and **(E)** np-PTEN demonstrating that Akt is bound to active PTEN  
831 exclusively in the APS group (n=2 per group). **(F-G)** Analysis of downstream Akt signalling in  
832 MCAO brain revealed lower levels of **(F)** p-Bad S136 and **(G)** p-S6RP S235/6 in the APS  
833 group. **(H)** Higher p-Akt levels were detected in matched MCAO kidney lysates from APS-IgG  
834 compared to HC-IgG animals. **(I)** Additional Akt signalling analysis identified lower p-eNOS  
835 S1177 levels in brain lysates of APS-IgG compared to HC-IgG animals (n=4 per group). **(J)** p-  
836 Akt and **(K)** p-eNOS were lower in APS-IgG carotid artery but not aortic lysates (n=3 per  
837 group). For panels A, H representative blots are shown for n=3 animals per MCAO and no-  
838 MCAO conditions. Complete blots for all individual lysates tested are provided in  
839 Supplementary Figure 1C (brain) and 1G (kidney). Results are normalised as follows: p-Akt,  
840 p-Bad, p-S6 to total Akt, Bad, S6 respectively; PP2AC, PTEN, np-PTEN to co-  
841 immunoprecipitated total Akt; p-eNOS to vinculin. \*p<0.05; \*\*p<0.01; \*\*\*p<0.001;  
842 \*\*\*\*p<0.0001; ns, non-significant.

843  
844 **Figure 3. aPL promote endothelial cell death and repress Akt activation following**  
845 **hypoxia-reperfusion injury *in vitro*.** HUVEC were incubated with 100 $\mu$ g/mL human IgG for  
846 4hr under hypoxic conditions followed by reperfusion for up to 24hr. Matched cells were  
847 treated with IgG and kept under normoxic conditions. **(A-B)** Cell death is expressed as fold  
848 change between 2hr, 3hr and 24hr reperfusion vs matched normoxic cultures. Higher rates of  
849 **(A)** apoptosis and **(B)** necrosis were observed in APS-IgG compared to HC-IgG treated  
850 HUVEC following hypoxia-reperfusion (n=7 per group). **(C)** After 2hr reperfusion, cells were  
851 harvested for protein analysis. Treatment with APS-IgG resulted in lower p-Akt S473, p-Bad  
852 S136 and p-eNOS S1177 levels compared to HC-IgG (n=2 per group). Results are normalised  
853 to loading controls: p-Akt/p-Bad to  $\beta$ -actin and p-eNOS to vinculin. **(D)** Extended IgG  
854 experiments revealed reduction of p-Akt following reperfusion. Representative immunoblots  
855 for two APS-IgG and two HC-IgG treated cultures under hypoxia-reperfusion (R) or normoxia  
856 (N), and untreated cells (media alone, M). Immunoblots for the remaining IgG samples tested

857 are provided in Supplementary Figure 2E. Results are shown as fold change of p-Akt levels  
858 (normalised to  $\beta$ -actin) at 2hr reperfusion vs normoxia (n=12 APS-IgG, n=10 HC-IgG).  
859 \*p<0.05; \*\*p<0.01; \*\*\*p<0.001; \*\*\*\*p<0.0001; ns, non-significant.

860  
861 **Figure 4. Exacerbated cell death and reduced p-Akt in APS ECFC following hypoxia-**  
862 **reperfusion.** Primary ECFC were subjected to hypoxia-reperfusion or normoxia. **(A-B)** Cell  
863 death is expressed as fold change between 2hr, 3hr and 24hr reperfusion vs matched  
864 normoxic cultures. Higher rates of **(A)** apoptosis and **(B)** necrosis were observed in APS  
865 compared to HC ECFC following hypoxia-reperfusion (n=10 per group). Luminescence  
866 (apoptosis) and fluorescence (necrosis) traces are provided in Supplementary Figure 4A-B.  
867 **(C)** Following 0.5hr and 2hr reperfusion, p-Akt levels were lower in APS (n=7) compared to  
868 HC ECFC (n=5). Left panel shows p-Akt normalised to  $\beta$ -actin for 0.5hr, 2hr reperfusion (0.5R,  
869 2R) and normoxia (N). Right panel shows fold change of normalised p-Akt between culture  
870 conditions. **(D)** Similarly, p-Bad levels were lower in APS compared to HC ECFC. Comparative  
871 responses in two untreated HUVEC pools (HUV1, HUV2) are shown for both p-Akt (C) and p-  
872 Bad (D); see quantification in Supplementary Figures C-D. Yellow circles, HC; blue circles,  
873 APS (n=10 per group). \*p<0.05; \*\*p<0.01; \*\*\*p<0.001; \*\*\*\*p<0.0001; ns, non-significant.

874  
875 **Figure 5. HCQ protects against hypoxia-reperfusion ECFC death *in vitro*.** **(A-B)** ECFC  
876 were pre-treated with 10 $\mu$ g/mL hydroxychloroquine (HCQ) for 24hr followed by hypoxia-  
877 reperfusion or kept under normoxic conditions. Cell death is expressed as fold change  
878 between HCQ-treated and untreated cultures. At 2hr and 3hr post reperfusion, HCQ  
879 suppressed **(A)** apoptosis and **(B)** necrosis in APS and a proportion of HC ECFC. This  
880 protective effect was more prominent in APS ECFC (n=10 per group). **(C)** HCQ promotes  
881 elevated p-Bad levels post-reperfusion in both HC and APS ECFC (n=3 per group). **(D)**  
882 Separating APS ECFC donors into those with previous cardiovascular events (CVE, n=6) vs  
883 those without (no-CVE, n=4) revealed greater protection from hypoxia-reperfusion induced  
884 cell death in the no-CVE group. Results are expressed as fold change of cell death in HCQ-  
885 treated vs untreated ECFC. In the absence of HCQ treatment, no obvious difference between  
886 cell death rates was observed in CVE vs no-CVE groups (Supplementary Figure 5E). \*p<0.05;  
887 \*\*p<0.01; \*\*\*p<0.001; \*\*\*\*p<0.0001; ns, non-significant.

888  
889 **Supplementary Figure 1:**  
890 **(A)** Purified APS- and HC-IgG used in the *in vivo* model was tested for aCL and ab2GPI activity  
891 at up to 500ug/mL. ELISA results are shown as net optical density units (OD450nm). Using  
892 in-house calibrators with pre-defined activity units,<sup>33</sup> both APS-IgG preparations were strongly  
893 positive (activity units provided for 100ug/mL). HC-IgG were negative (n=2 APS, n=4 HC).  
894 **(B)** Schematic of APS *in vivo* stroke model procedures.  
895 **(C)** p-Akt S473 blots for individual brain lysates (n=4 per MCAO group, n=6 per no-MCAO  
896 group). Normalised to total Akt. Quantification is shown in Figure 2A.  
897 **(D)** p-Akt T308 levels in MCAO rat brain revealed lower levels in APS compared to HC animals  
898 (n=4 per group). Normalised to total Akt. Results are shown as median  $\pm$  interquartile range.  
899 **(E)** p-Akt levels negatively correlate with infarct size (n=4 per group). \*p<0.05.  
900 **(F)** p38, ERK1/2 (p44/p42) and JNK1/2 (p54/p46) in MCAO rat brain were similar in APS and  
901 HC animals (n=4 per group). Normalised to total p38, ERK1/2, JNK1/2 respectively. Results  
902 are shown as median  $\pm$  interquartile range.  
903 **(G)** p-Akt S473 blots for individual kidney lysates (n=5 per APS MCAO, n=4 HC MCAO, n=6  
904 APS and HC no-MCAO). Normalised to total Akt. Quantification is shown in Figure 2H.  
905 **(H)** p-Akt S473 was assessed in the liver and spleen of MCAO animals with no apparent  
906 differences observed (all n=5 except HC spleen, n=4). Normalised to total Akt. Results are  
907 shown as median  $\pm$  interquartile range.

908  
909 **Supplementary Figure 2:**  
910 **(A)** As a positive control for the real-time apoptosis/necrosis assay, HUVEC under normoxic  
911 conditions were treated for 2hr with 100 $\mu$ M H<sub>2</sub>O<sub>2</sub> followed by washout/recovery for 24hr. H<sub>2</sub>O<sub>2</sub>

912 induced both necrosis and apoptosis. Results are shown at 2hr, 3hr and 24hr post-H<sub>2</sub>O<sub>2</sub>  
913 removal and expressed as fold change of apoptosis/necrosis between H<sub>2</sub>O<sub>2</sub> and untreated  
914 HUVEC (n=2 individual HUVEC pools).

915 **(B)** Enhanced cell death in HUVEC subjected to simulated hypoxia-reperfusion *in vitro*, shown  
916 at 2hr, 3hr and 24hr post reperfusion. Results are expressed as fold change of  
917 apoptosis/necrosis between matched reperfused and normoxic cultures.

918 **(C)** Levels of p-Akt in HUVEC tested at 0.5hr, 2hr reperfusion (0.5R, 2R) and normoxia (N). p-  
919 Akt is higher following hypoxia/reperfusion compared to normoxia. Normalised to β-actin.

920 **(D)** Levels of p-Bad in HUVEC tested at 0.5hr, 2hr reperfusion (0.5R, 2R) and normoxia (N).  
921 p-Bad is higher following hypoxia-reperfusion compared to normoxia. Normalised to β-actin.

922 **(E)** p-Akt S473 and β-actin blots for individual APS-IgG and HC-IgG treated HUVEC cultures  
923 (n=10 APS-IgG, n=8 HC-IgG shown here). M=media alone, untreated. Lysates were collected  
924 at 2hr reperfusion (R) or under normoxia (N). Blots from two additional IgG samples per group  
925 and total quantification is shown in Figure 3D.

926

### 927 **Supplementary Figure 3:**

928 **(A)** Schematic of ECFC isolation. PBMC are plated on collagen coated cell culture vessels  
929 and grown in endothelial growth medium-2 (EGM2) supplemented with 20% FBS. Endothelial  
930 colonies usually appear within 7-21 days post PBMC seeding and passaged further once well  
931 established.

932 **(B)** (i) ECFC colony detected at day 10 post PBMC isolation (left image) and (ii) established  
933 ECFC at passage 4 (4x magnification). Representative immunofluorescence images of ECFC  
934 at passage 4, stained for canonical endothelial markers (iii) CD144; (iv) von Willebrand factor  
935 (vWF); and (v) CD31.

936 **(C)** Flow cytometry gating strategy to characterize endothelial identity of ECFC at passage 4.  
937 (i) Forward/side scatter (FS/SS) gating on all cells. (ii) Doublets are excluded to capture only  
938 single cells. (iii) Dead cells stained with Zombie dye are excluded. (iv-v) ECFC are  
939 CD31/CD144/CD146 positive and (vi) CD45/CD14 negative.

940 **(D)** ECFC generation parameters as recommended by international standardisation  
941 guidelines for ECFC isolation.<sup>40</sup> (i) Colony count: total number of colonies detected,  
942 normalised to number of PBMC seeded (x10<sup>7</sup>). (ii) First colony detected: expressed in number  
943 of days post PBMC seeding. (iii) First passage: number of days post PBMC seeding where  
944 ECFC colonies were passaged from P0 to P1. Results are shown as median ± interquartile  
945 range. No significant differences were found.

946

### 947 **Supplementary Figure 4:**

948 **(A-B)** Representative (A) luminescence (apoptosis) and (B) fluorescence (necrosis) traces for  
949 APS and HC ECFC measured at 2hr, 3hr and 24hr reperfusion or normoxia (n=5 per group).  
950 The average of n=3 replicate wells per sample per condition is plotted.

951 **(C)** Levels of p-Akt in (i) HC ECFC and (ii) APS ECFC tested at 0.5hr, 2hr reperfusion (0.5R,  
952 2R) and normoxia (N). Normalised to β-actin. \*p<0.05; ns, non-significant.

953 **(D)** Levels of p-Bad in (i) HC ECFC and (ii) APS ECFC tested at 0.5hr, 2hr reperfusion (0.5R,  
954 2R) and normoxia (N). Normalised to β-actin. \*p<0.05; ns, non-significant.

955 **(E)** p-Akt levels at 0.5hr (x-axis) correlate with p-Bad levels at 2hr reperfusion (y-axis).

956

### 957 **Supplementary Figure 5:**

958 **(A-B)** Variable effect of hydroxychloroquine (HCQ) on (A) apoptosis and (B) necrosis in ECFC  
959 cultured under normoxic conditions.

960 **(C)** p-Bad levels in HC and APS ECFC with or without HCQ treatment under (i) normoxia and  
961 following (ii) 0.5hr or (iii) 2hr reperfusion.

962 **(D)** Comparison of cell death responses in ECFC from APS donors with a previous history of  
963 cardiovascular events (CVE) vs those without (no-CVE).

964 **(E)** Comparison of cell death responses in ECFC from APS donors who received HCQ  
965 compared to those not receiving HCQ at the time of ECFC isolation.

966 **(F)** Comparison of cell death responses following exogenous HCQ treatment, between ECFC  
967 from APS donors who were on HCQ compared to those not on HCQ at the time of ECFC  
968 isolation. **(D-F)** are expressed as fold change of cell death rates under hypoxia-reperfusion  
969 (H/R) vs normoxia.

**Figure 1**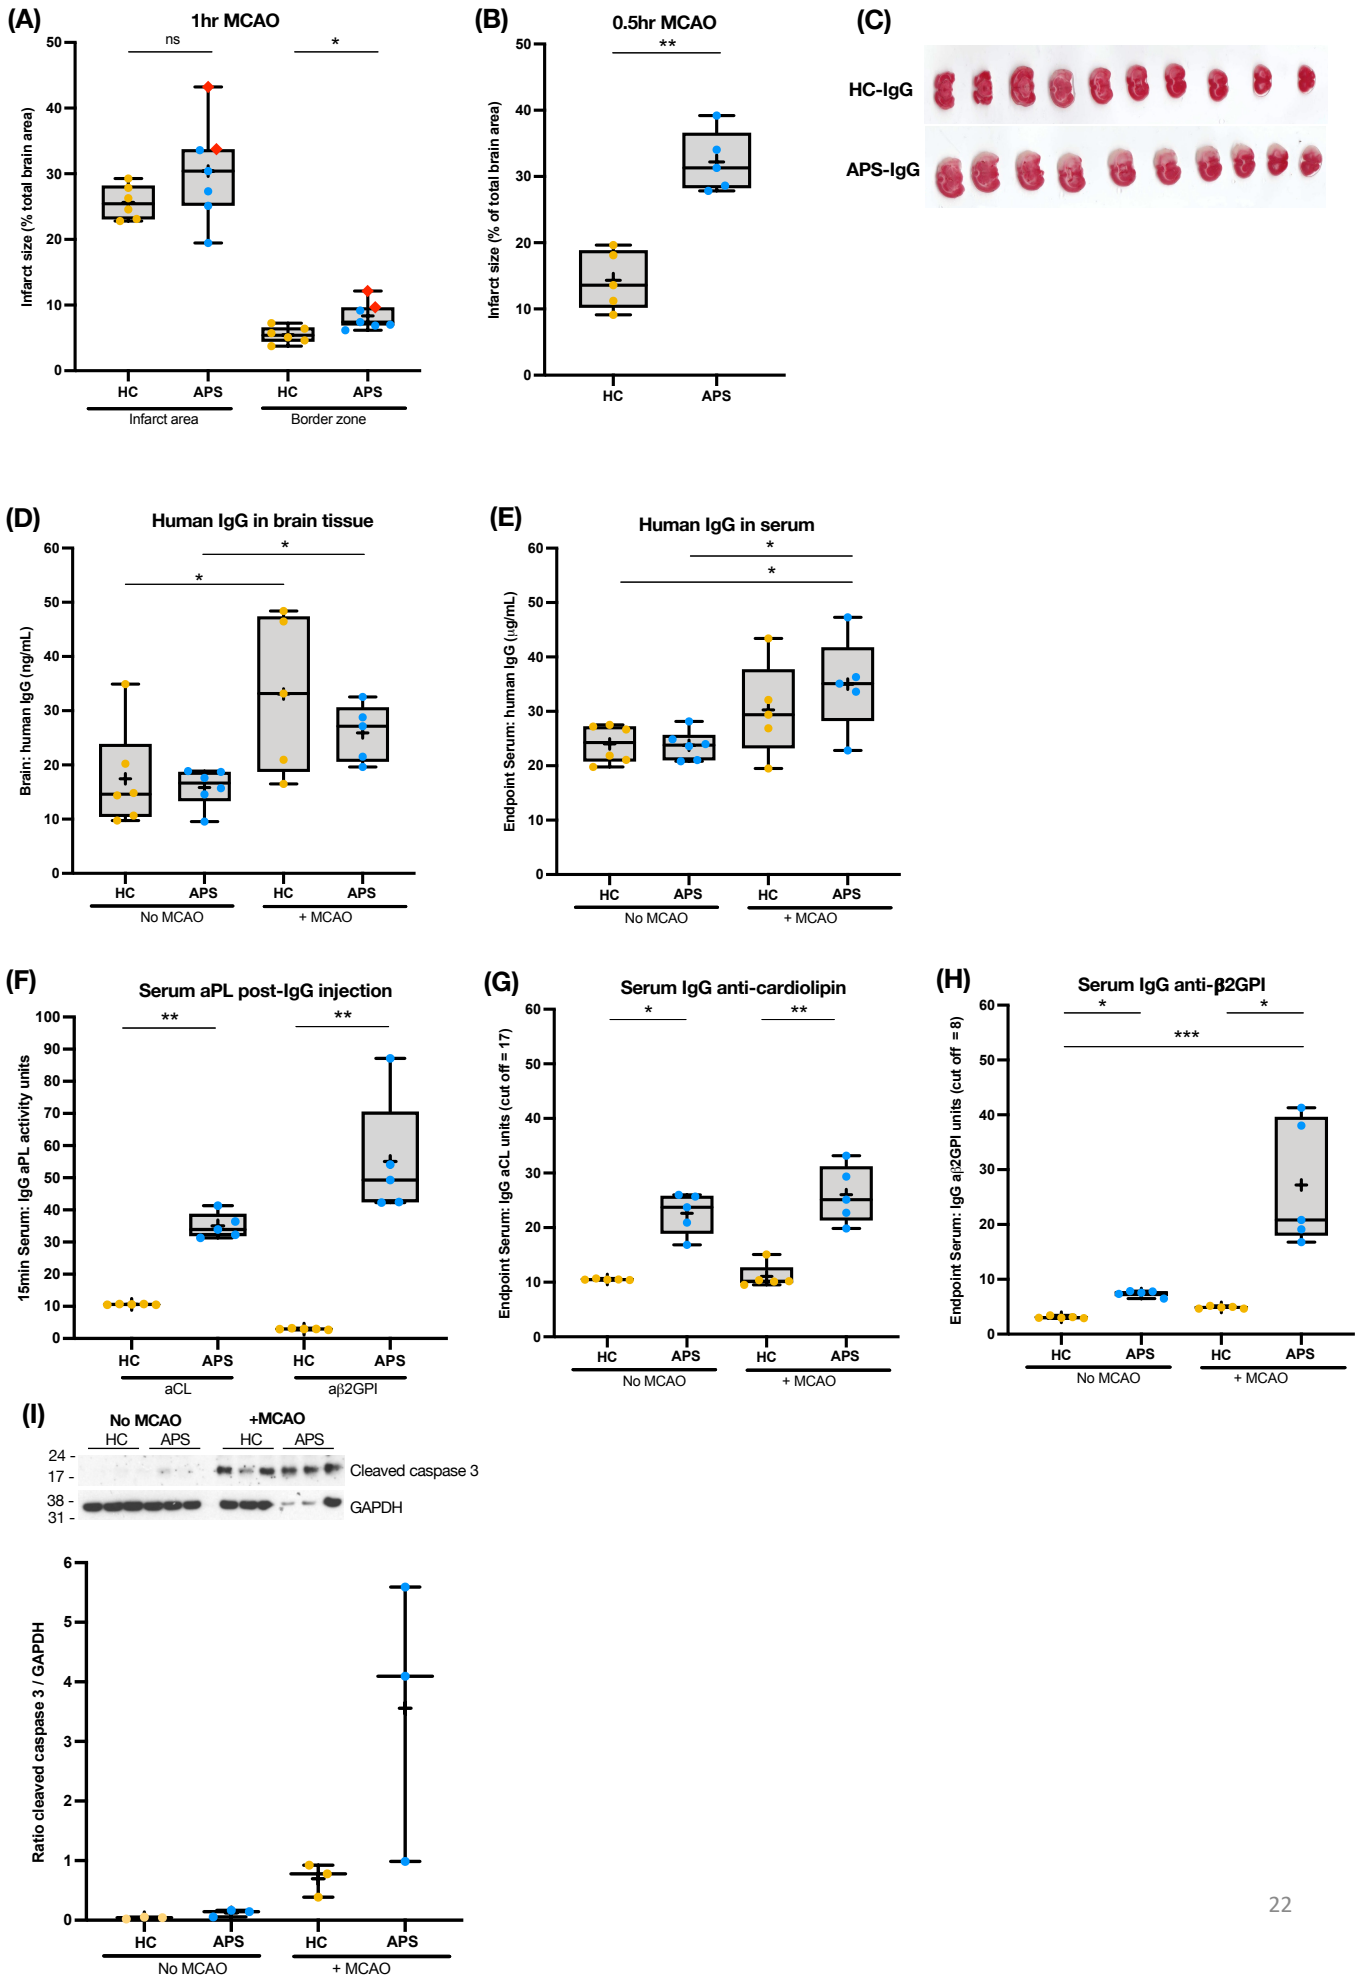

**Figure 2**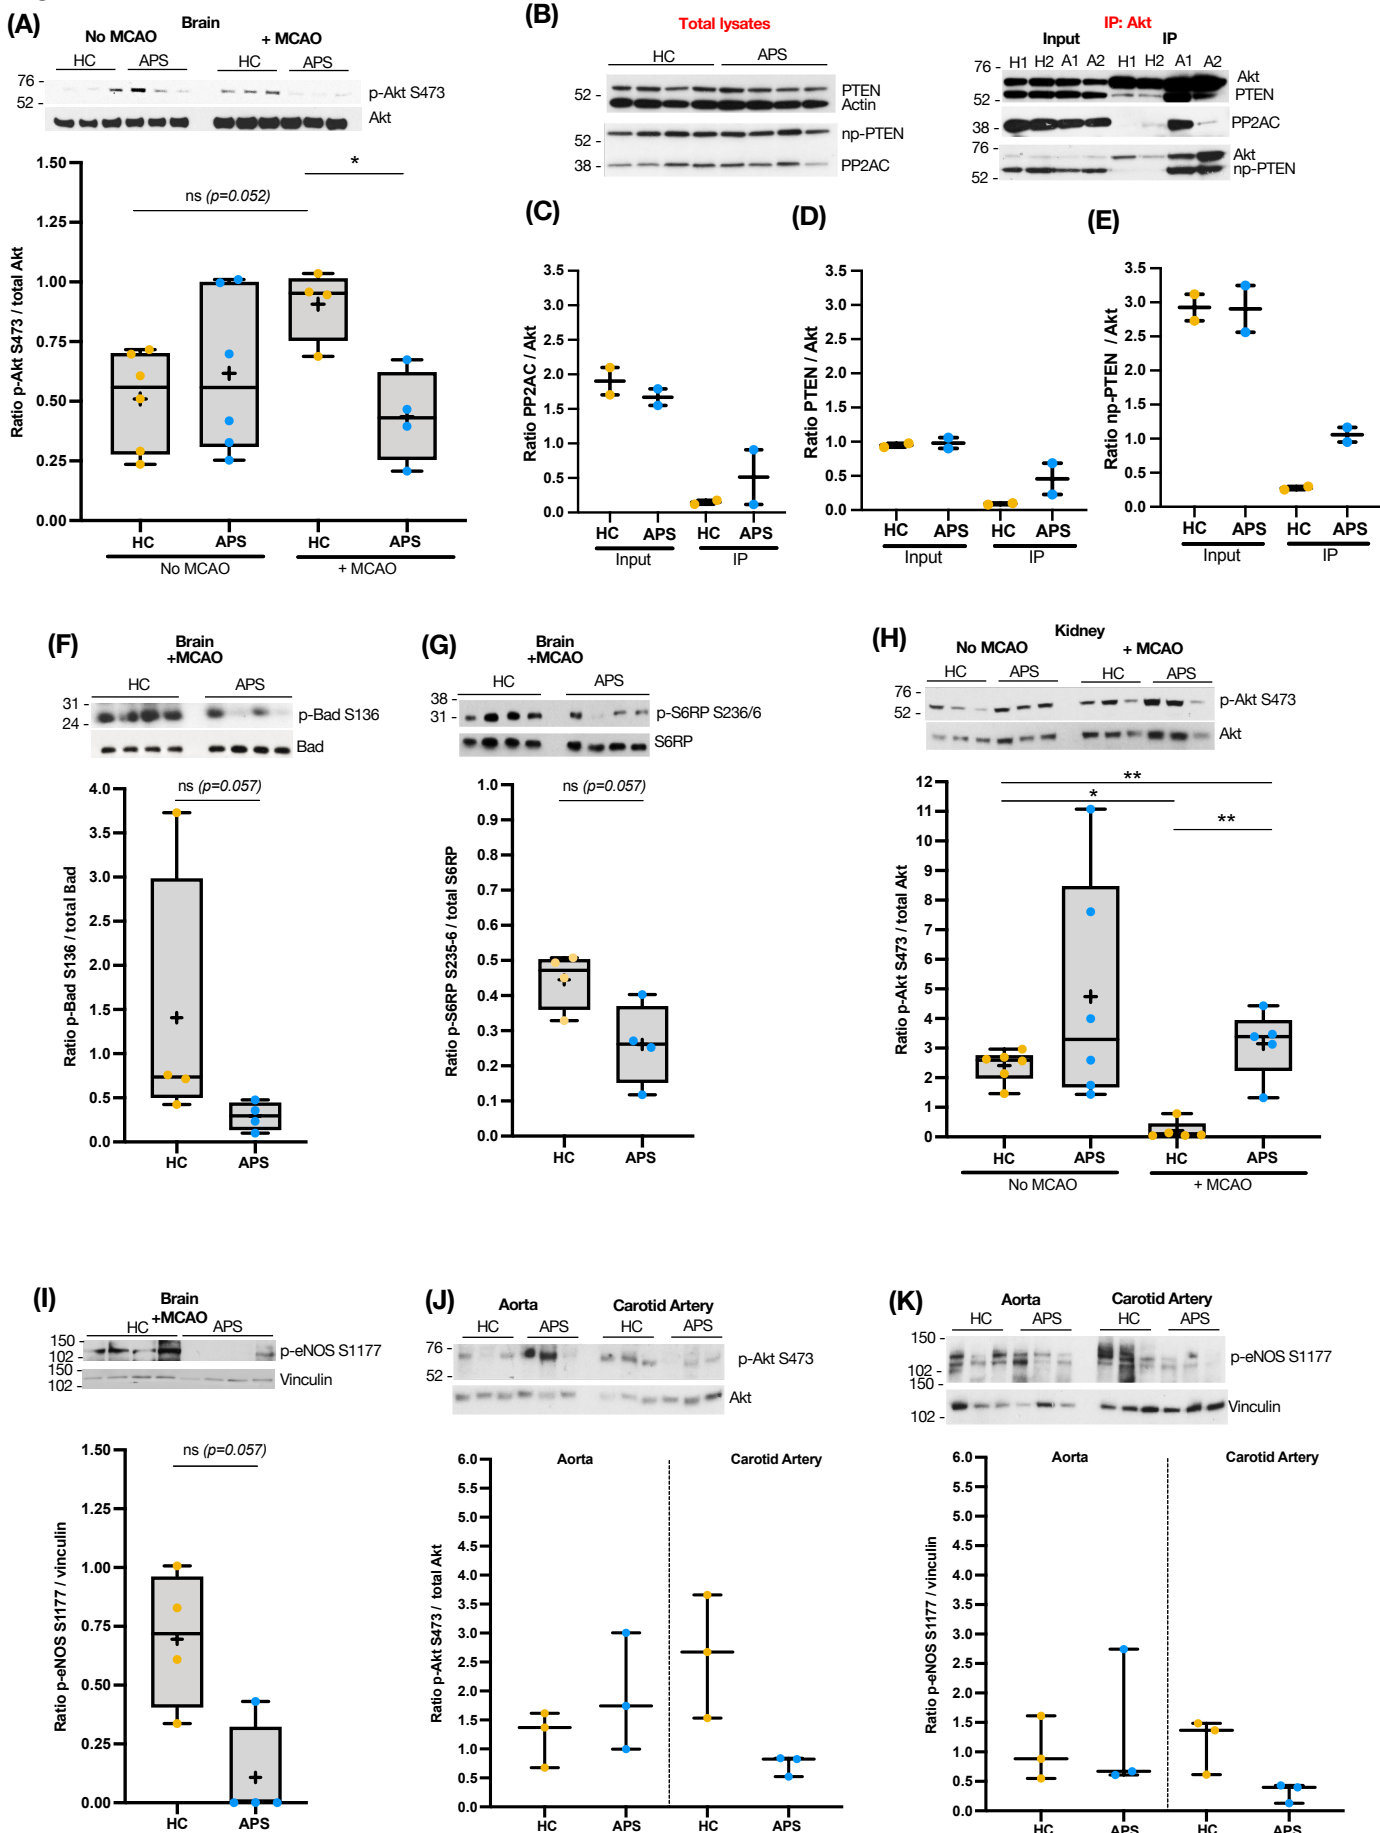



**Figure 3**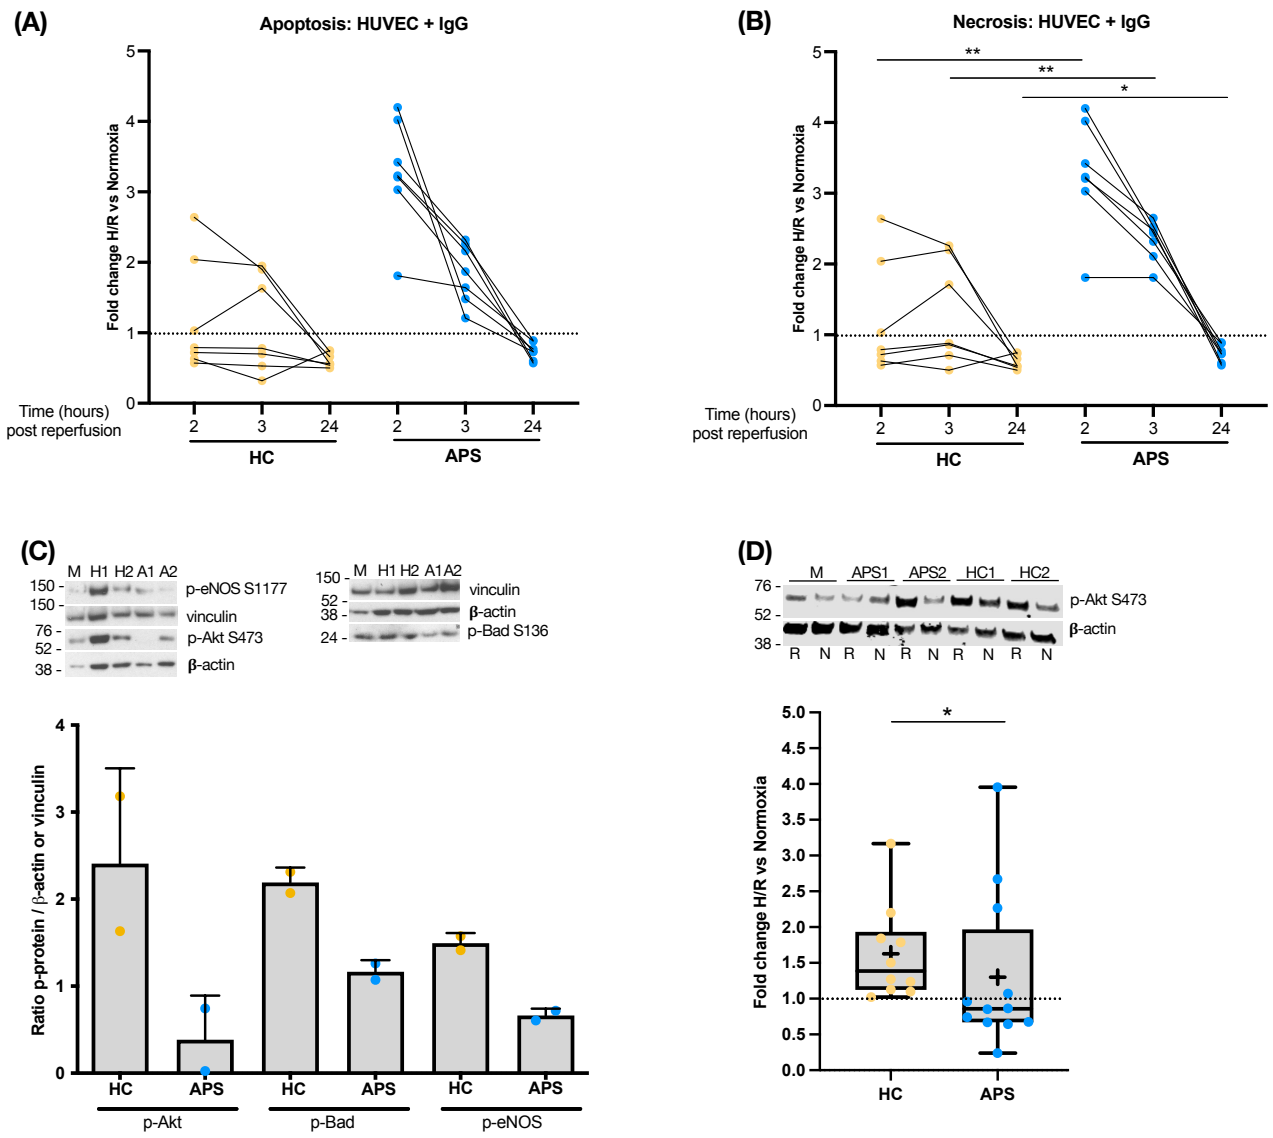

**Figure 4**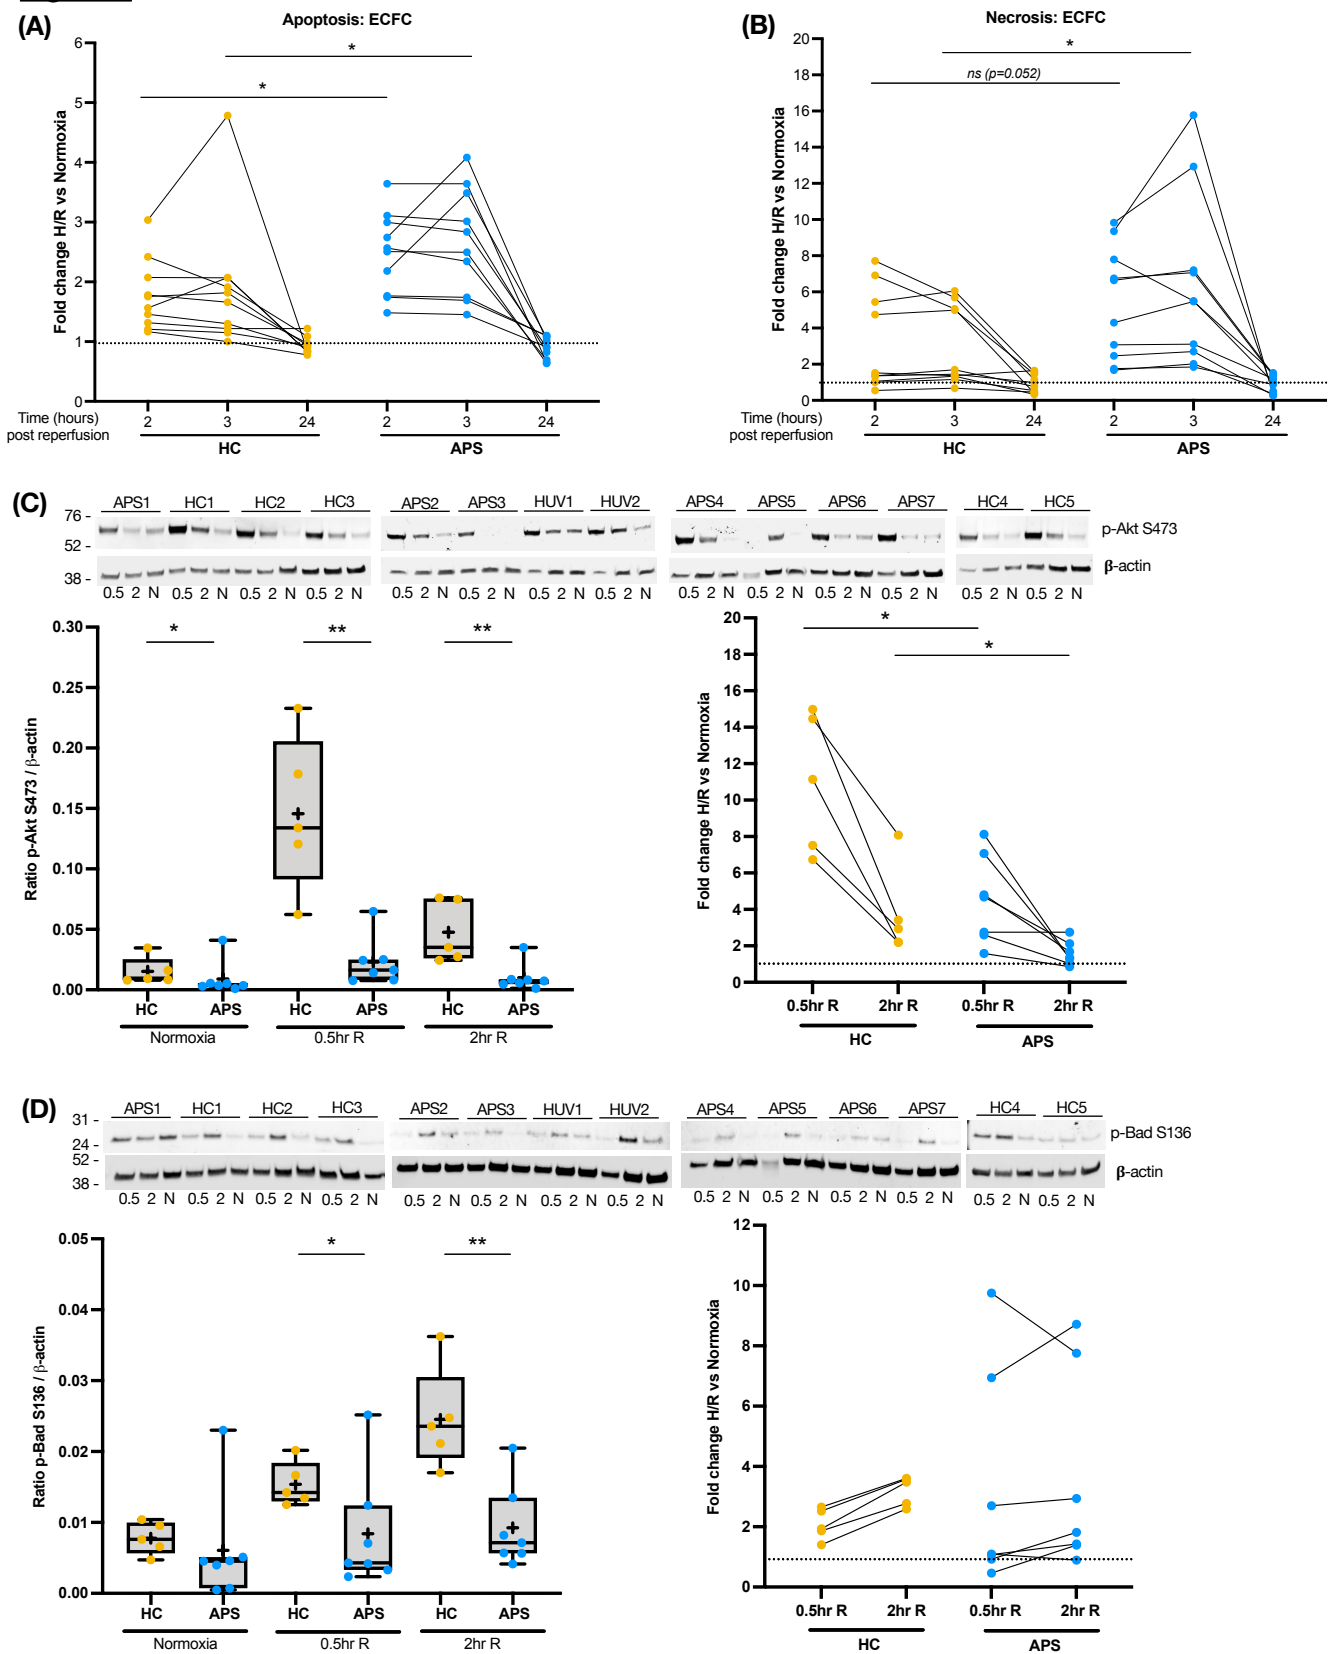

**Figure 5**

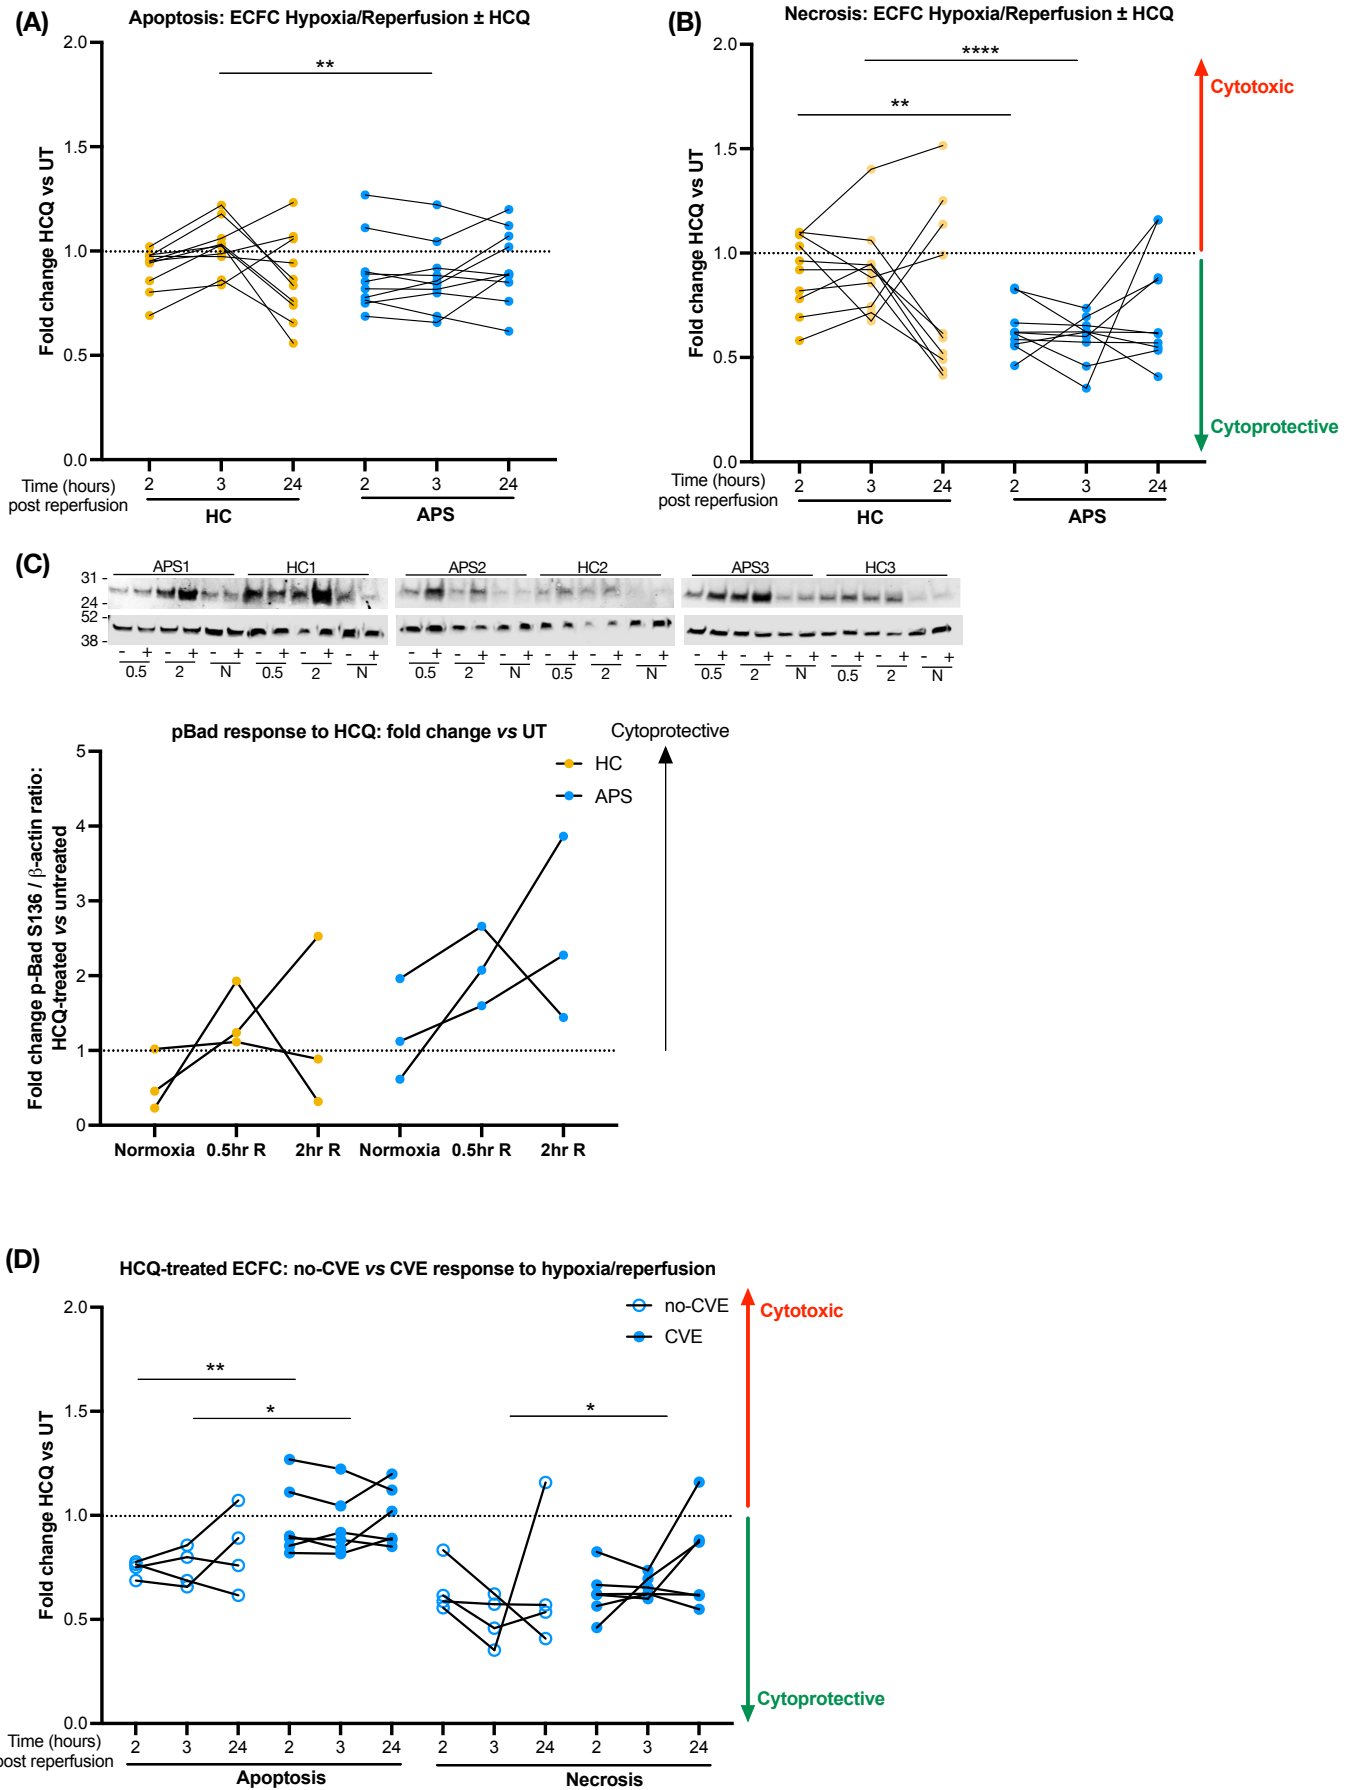

# Supplementary Figure 1

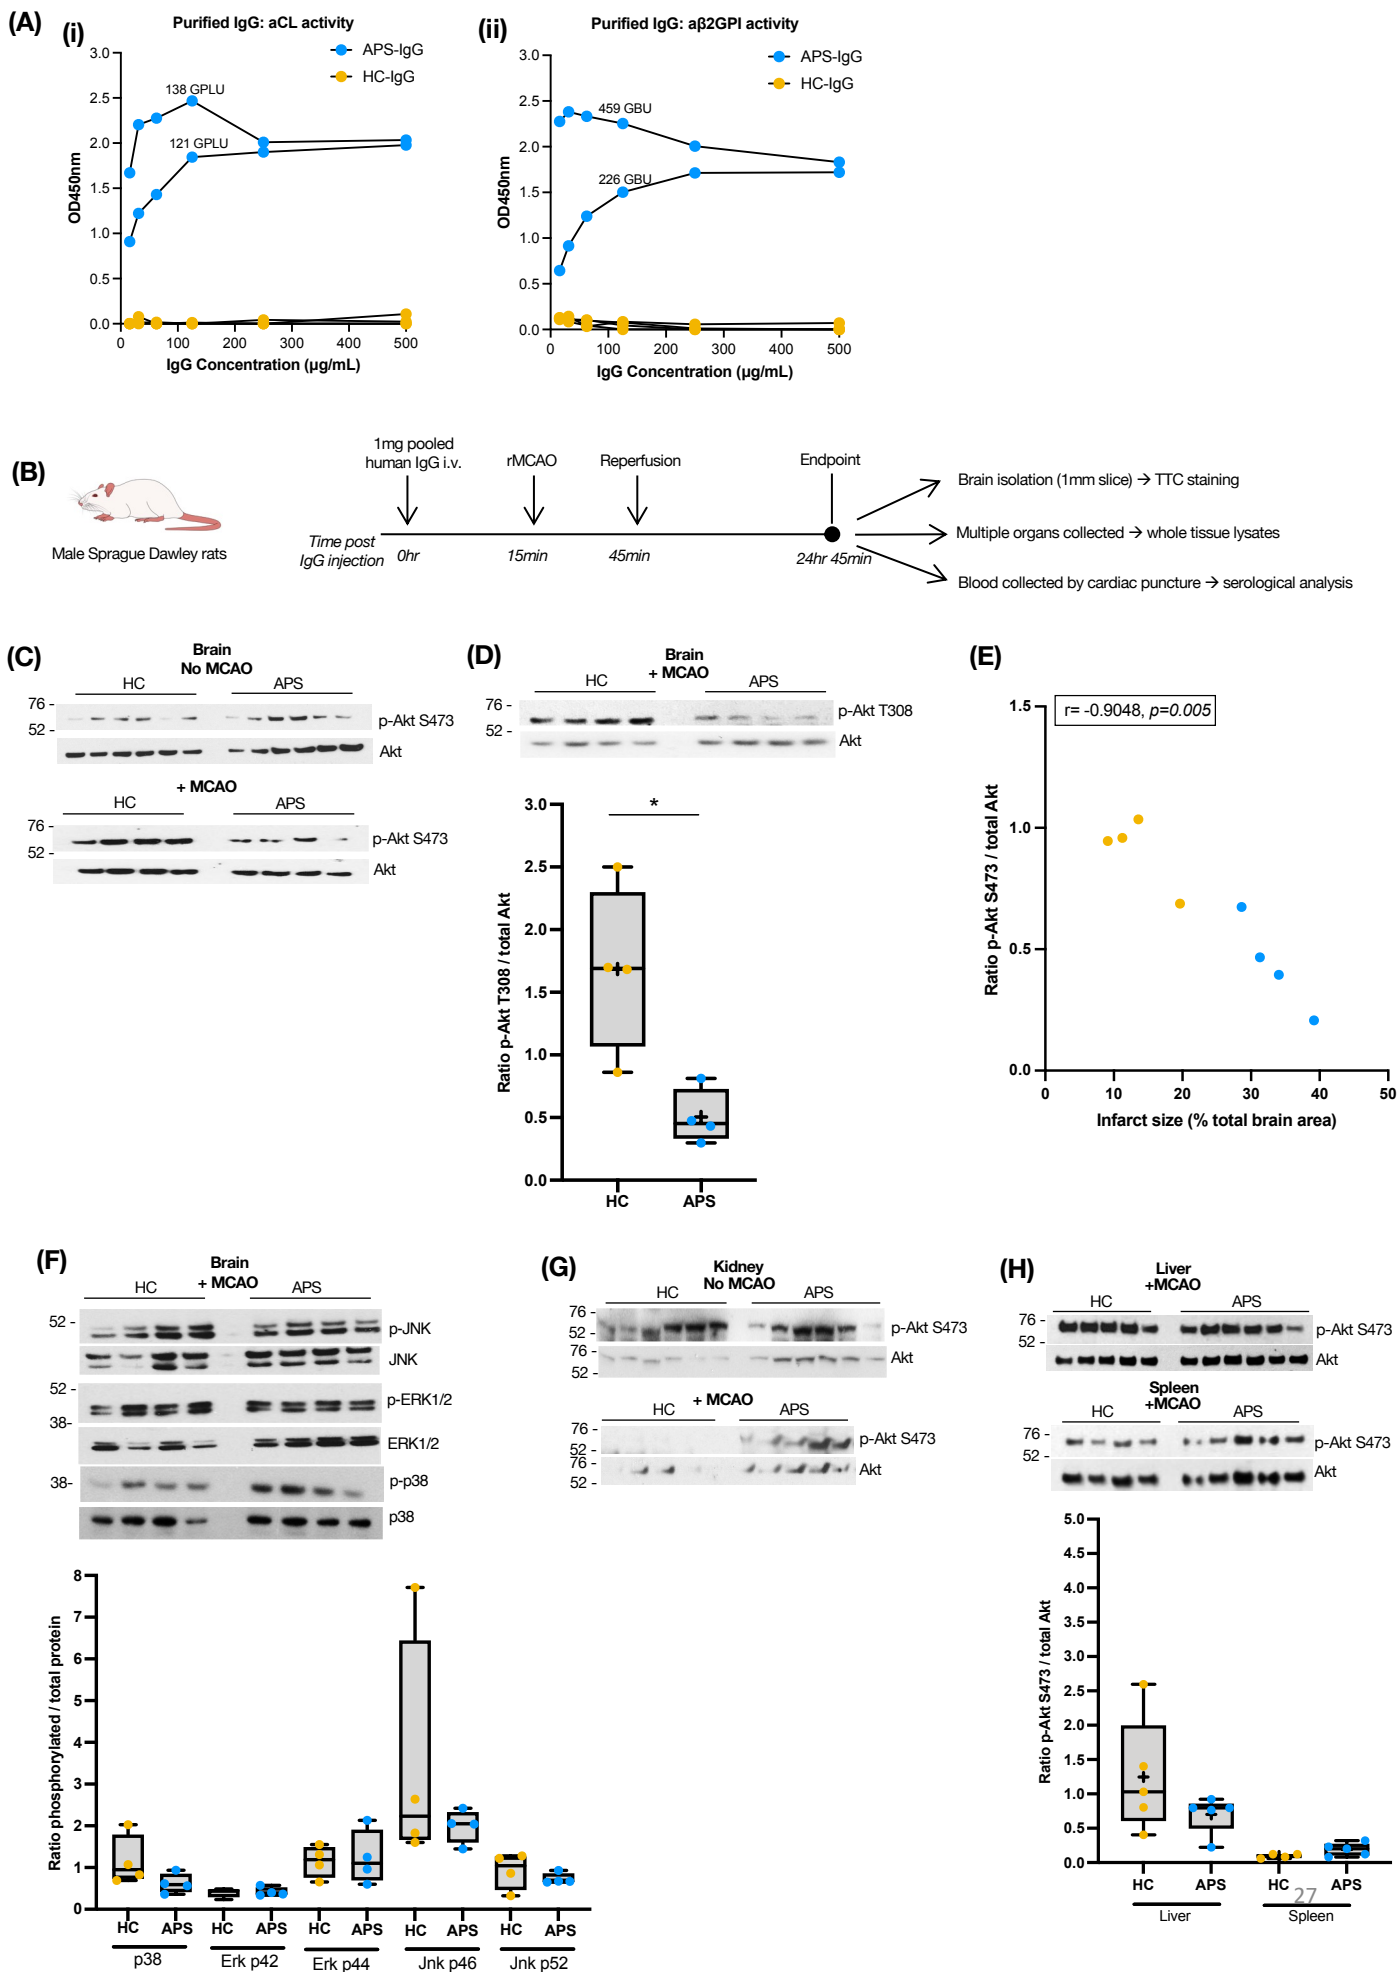

## Supplementary Figure 2

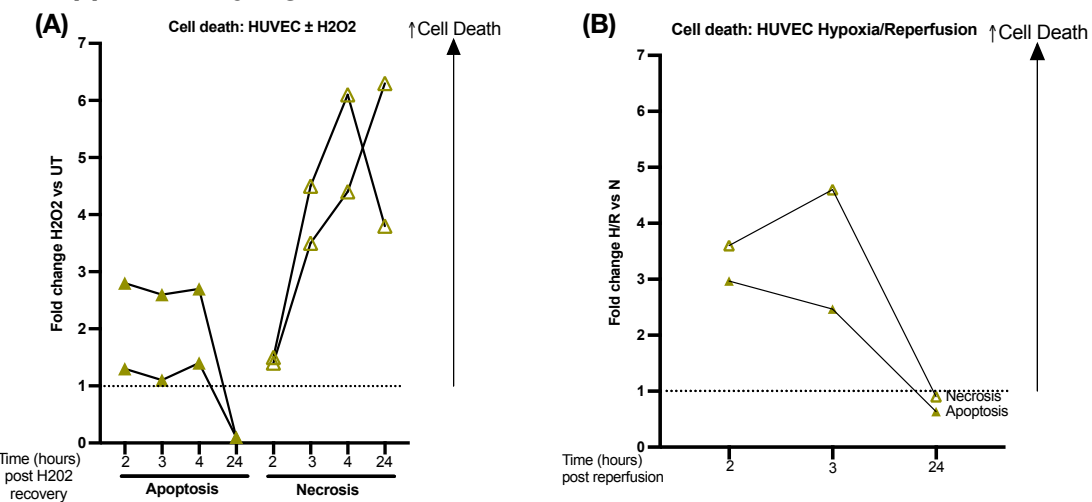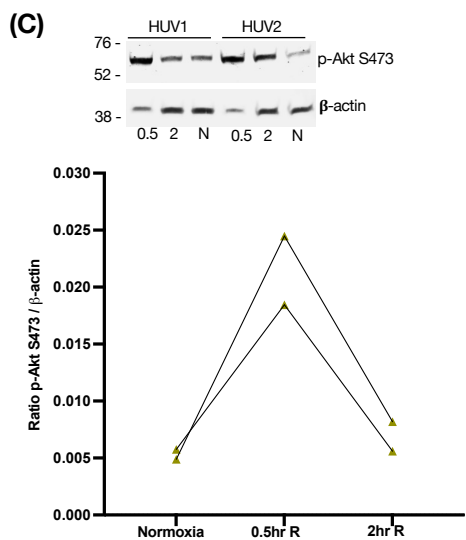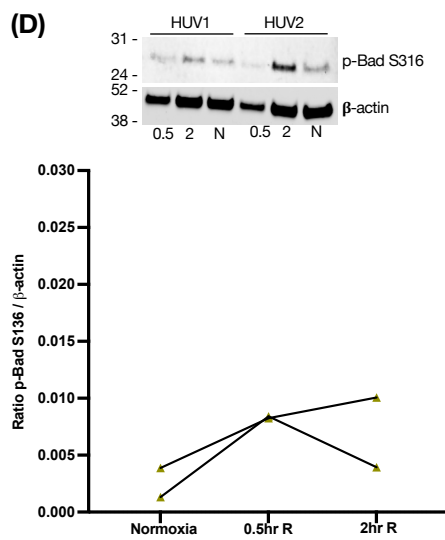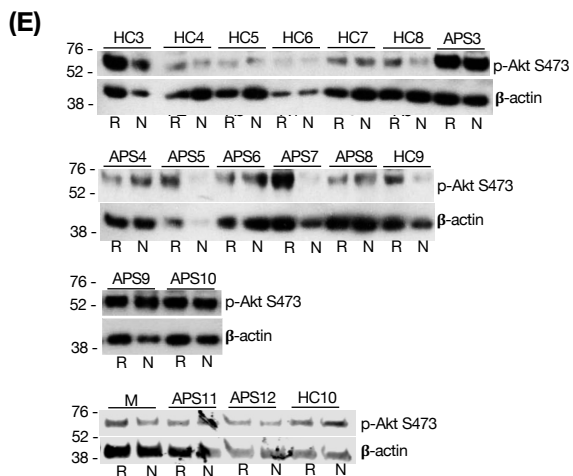

### Supplementary Figure 3

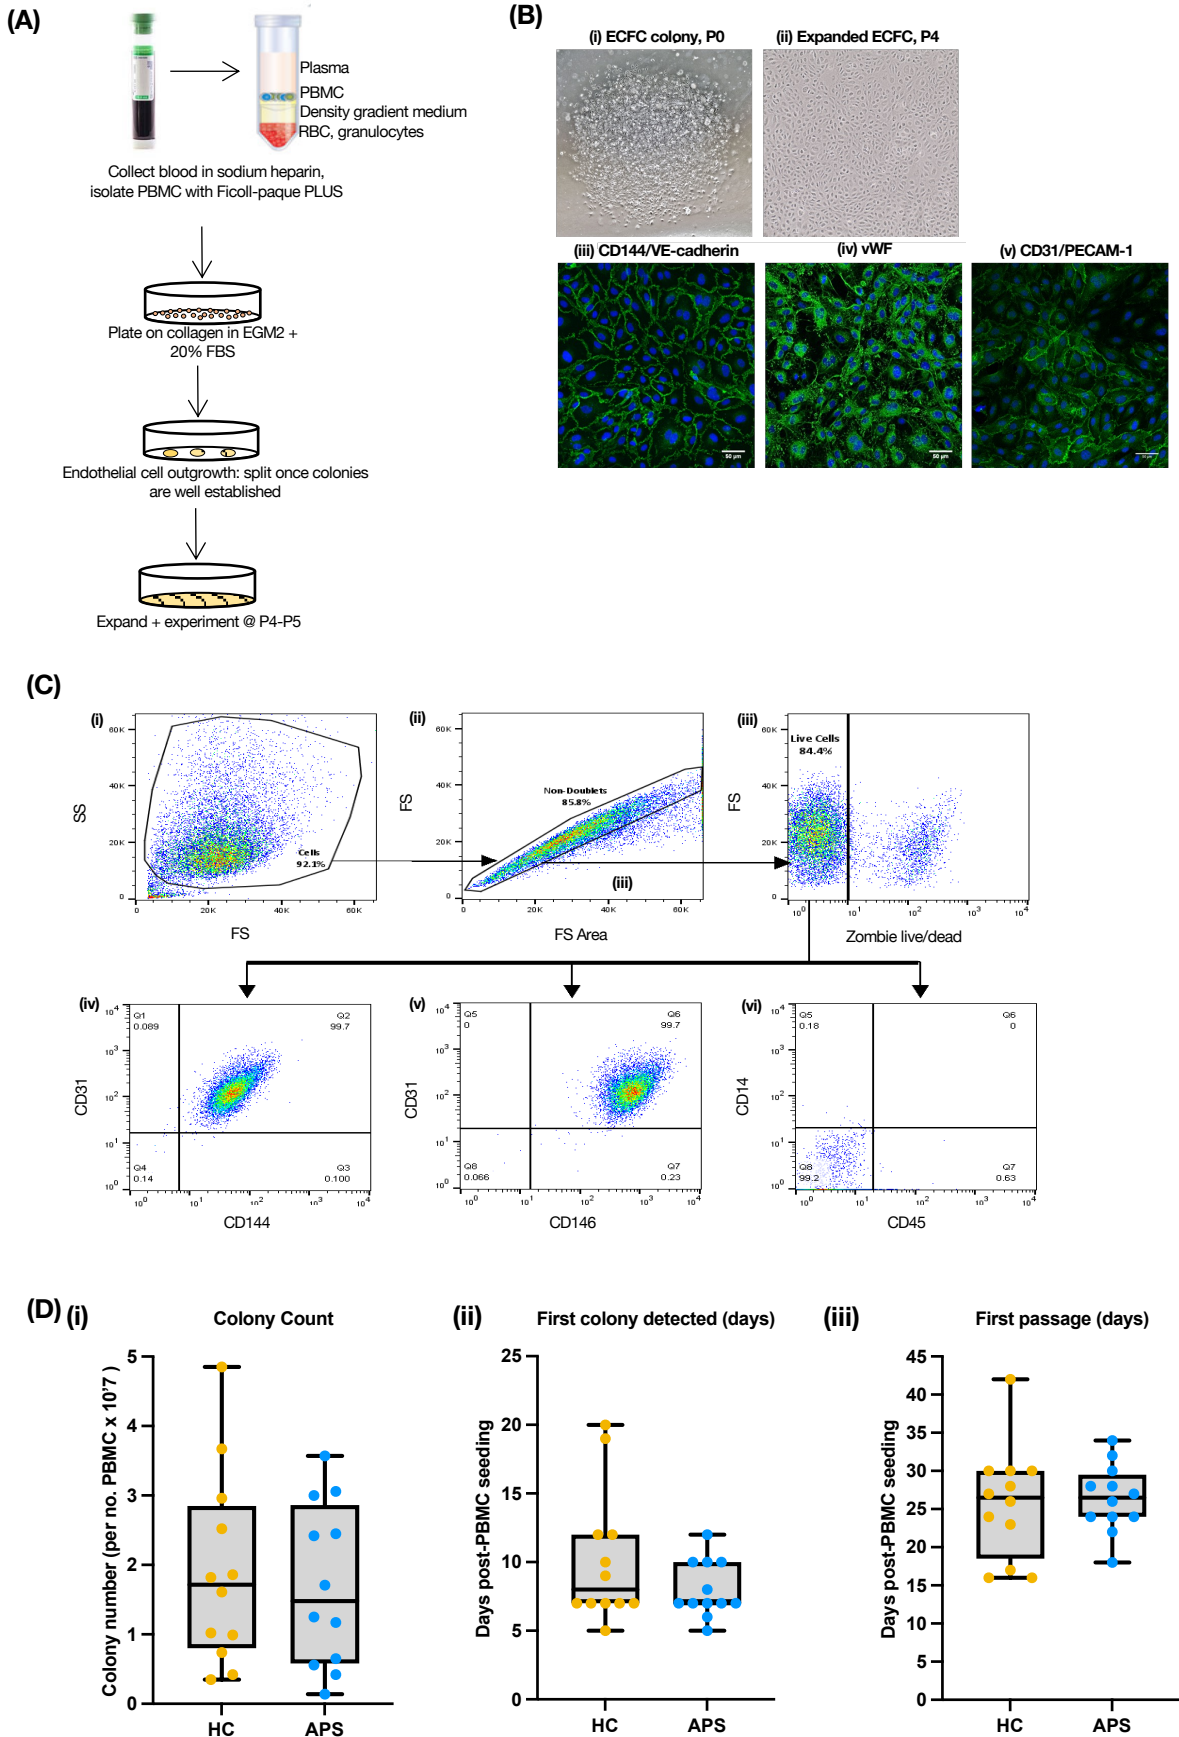

# Supplementary Figure 4

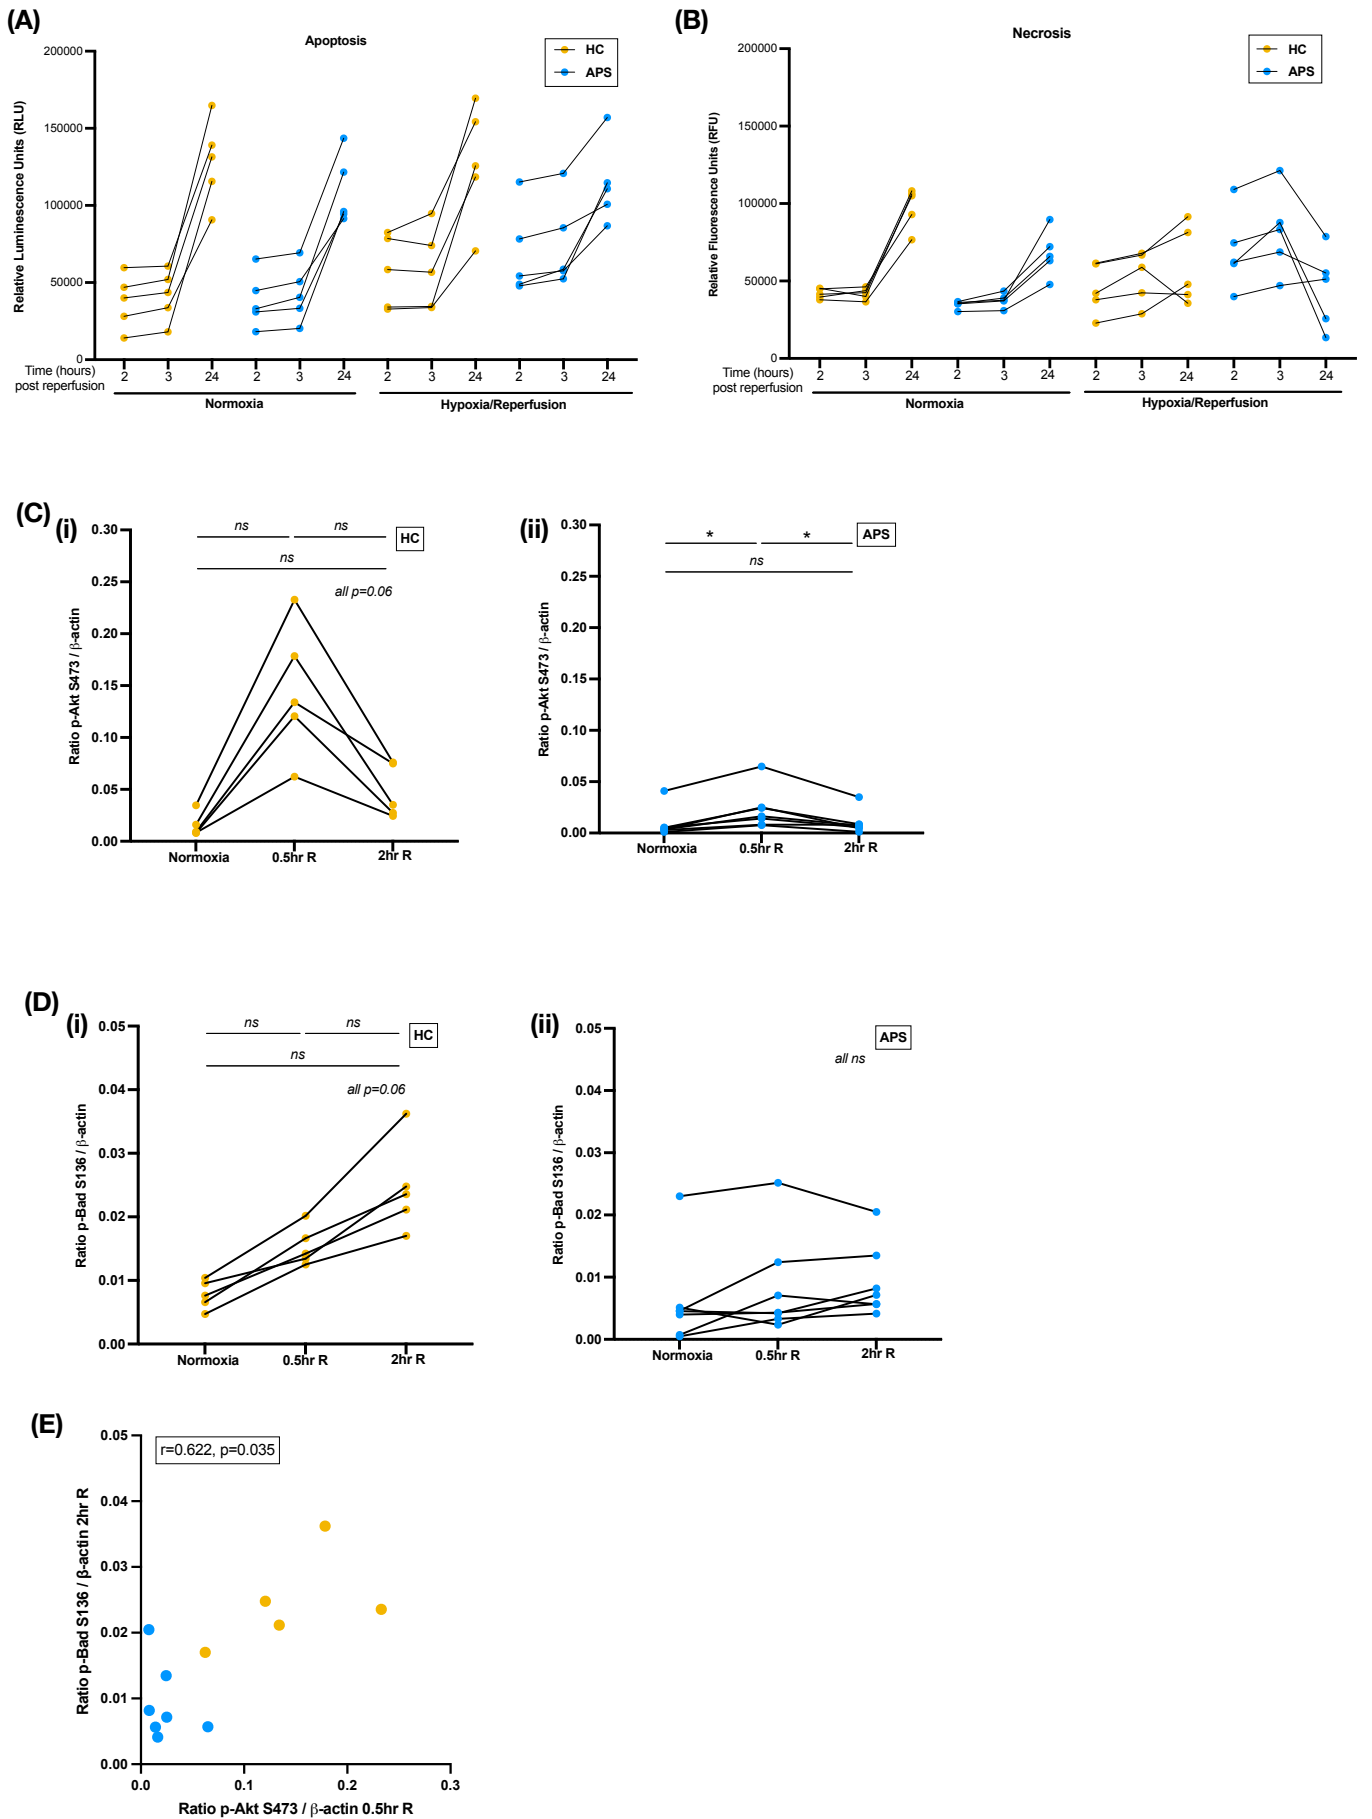

## Supplementary Figure 5

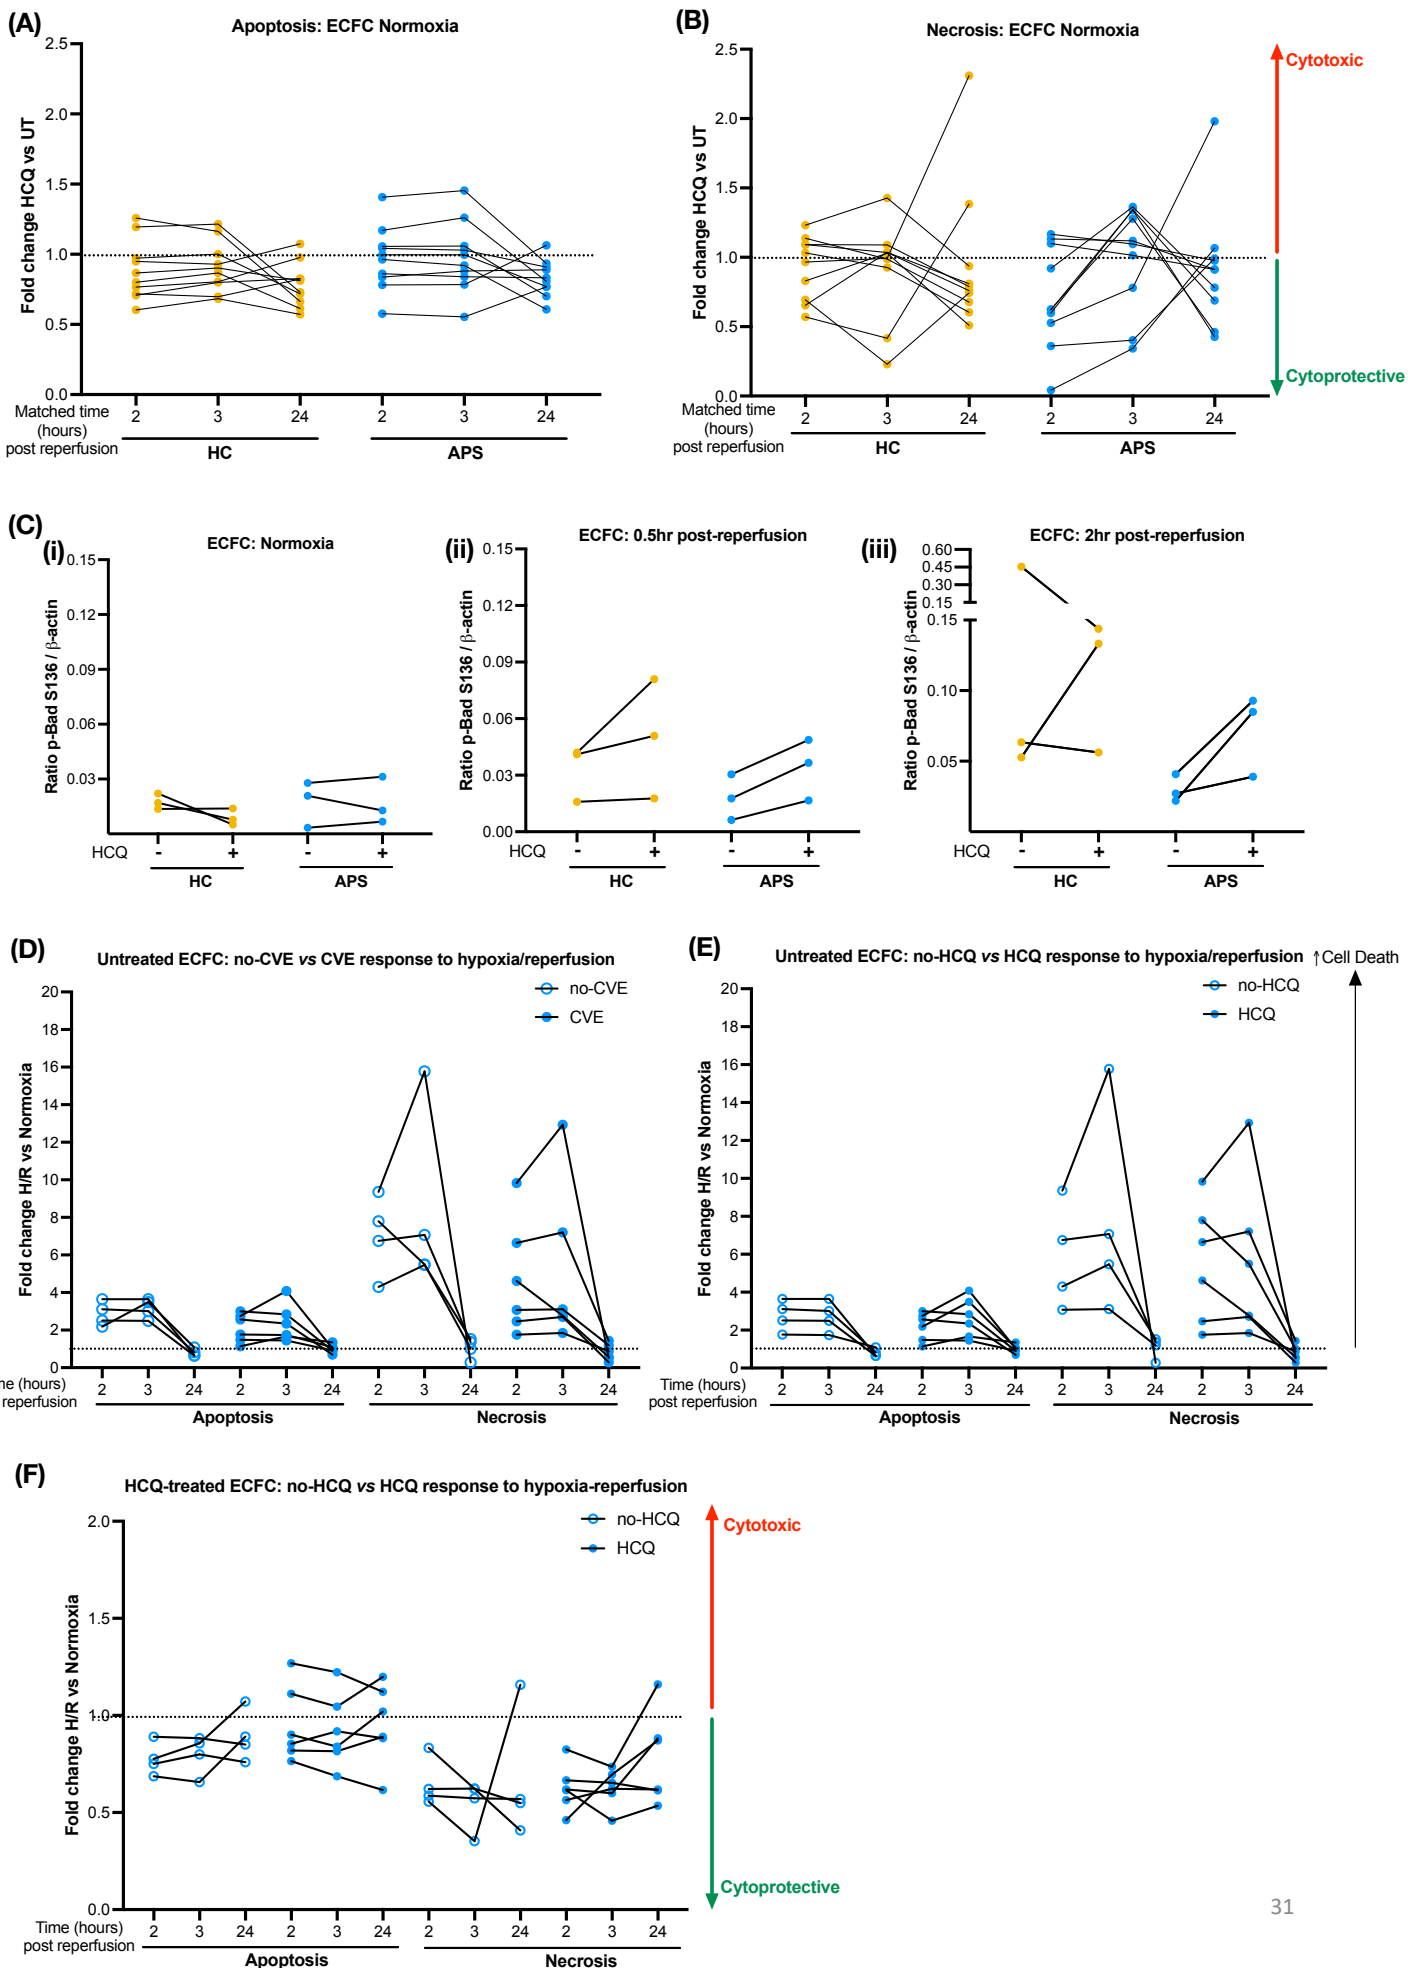

Source: https://medrxiv.org/content/10.1101/2024.01.04.24300876v1.full.pdf
